# Supplementary material
Source: HighWire-hosted journal article supplement (https://gh.bmj.com/content/8/8/e012308)
Supplement: inline-supplementary-material-4 [file inline-supplementary-material-4.pdf]

**Table S1: Characteristics of included sources of evidence.**

| Author/Year                        | Title of Publication/Document                                                                             | Type of publication/document                                        | Country/Region of focus                                                                      | Objective of the document                                                                                                                                                                                                                                                                                                                                                                                                                                             |
|------------------------------------|-----------------------------------------------------------------------------------------------------------|---------------------------------------------------------------------|----------------------------------------------------------------------------------------------|-----------------------------------------------------------------------------------------------------------------------------------------------------------------------------------------------------------------------------------------------------------------------------------------------------------------------------------------------------------------------------------------------------------------------------------------------------------------------|
| DeMaria et al (2018) <sup>34</sup> | Safe innovation: On medical device legislation in Europe and Africa                                       | Journal article<br><i>Health Policy and Technology</i>              | Africa: 8 countries including Kenya, Egypt, Malawi, Tanzania, Uganda, Nigeria, SA, Ethiopia. | To compare the certification route that manufacturers have to respect for marketing a medical device in some African countries. Several African countries have oriented their regulatory processes for medical devices on the EU system. In this paper, after outlining the EU regulatory framework, we will analyse the regulatory landscape in a number of African countries with at least a representative of the African Biomedical Engineering Consortium (ABEC) |
| Dacombe et al (2019) <sup>35</sup> | Regulation of HIV self-testing in Malawi, Zambia and Zimbabwe: a qualitative study with key stakeholders. | Journal article<br><i>Journal of the International AIDS Society</i> | Malawi, Zambia and Zimbabwe                                                                  | To determine the current regulatory status of HIV self-test kits in Malawi, Zambia and Zimbabwe and document the perceptions and suggestions of key stakeholders regarding current and future HIVST regulation in each country.                                                                                                                                                                                                                                       |

|                                          |                                                                                                                                                                                               |                                                                         |                                                                                                                                                                                                                                                      |                                                                                                                                                                                                                                                                          |
|------------------------------------------|-----------------------------------------------------------------------------------------------------------------------------------------------------------------------------------------------|-------------------------------------------------------------------------|------------------------------------------------------------------------------------------------------------------------------------------------------------------------------------------------------------------------------------------------------|--------------------------------------------------------------------------------------------------------------------------------------------------------------------------------------------------------------------------------------------------------------------------|
| Dube-Mwezi et al (2020) <sup>36</sup>    | A rapid assessment of the National Regulatory Systems for medical products in the Southern African Development Community                                                                      | Journal article<br><i>Journal of Pharmaceutical Policy and Practice</i> | South African Development Community                                                                                                                                                                                                                  | Analysing the regulatory systems for medical products in the 16 Member States of the Southern African Development Community (SADC). Themes such as the governance, regulatory framework for medical products, and medical devices and equipment framework were explored. |
| Hubner et al (2021) <sup>37</sup>        | The Evolving Landscape of Medical Device Regulation in East, Central, and Southern Africa                                                                                                     | Journal article<br><i>Global Health Science and Practice</i>            | 14 member countries of the College of Surgeons of East, Central, and Southern Africa, and South Africa (COSECA): Botswana, Burundi, Ethiopia, Kenya, Malawi, Mozambique, Namibia, Rwanda, South Sudan, Sudan, Tanzania, Uganda, Zambia and Zimbabwe. | The review provides a summary of the state of medical device regulation in the countries of focus.                                                                                                                                                                       |
| Kedwani et al (2019) <sup>38</sup>       | Analysis of regulatory requirements of medical devices and in-vitro diagnostics worldwide for the development of an efficient procedure of registration for manufacturers of medical products | Journal article<br><i>Current Directions in Biomedical Engineering</i>  | Global (including Africa)                                                                                                                                                                                                                            | The paper investigates the role and activities of the most important harmonization groups in the design of the global regulatory landscape for MDs and IVDs                                                                                                              |
| McNerny and Peeling (2015) <sup>39</sup> | Regulatory In Vitro Diagnostics Landscape in Africa: Update on Regional Activities                                                                                                            | Journal article<br><i>Clinical Infectious Diseases</i>                  | Africa                                                                                                                                                                                                                                               | The article reviews the regulation of diagnostic tests for tuberculosis case detection with a focus on the World Health Organization (WHO) AFRO region                                                                                                                   |

|                                    |                                                                                                    |                                                                      |                                                                                                                                              |                                                                                                                                                                                                                                                                                                                                                          |
|------------------------------------|----------------------------------------------------------------------------------------------------|----------------------------------------------------------------------|----------------------------------------------------------------------------------------------------------------------------------------------|----------------------------------------------------------------------------------------------------------------------------------------------------------------------------------------------------------------------------------------------------------------------------------------------------------------------------------------------------------|
| McNerny et al (2014) <sup>40</sup> | Improving access to new diagnostics through harmonised regulation: priorities for action           | Journal article<br><i>Afr J Lab Med</i>                              | Developing countries (including in Africa)                                                                                                   | To provide an overview of regulation of diagnostic tests in developing countries.                                                                                                                                                                                                                                                                        |
| Mori et al (2011) <sup>41</sup>    | Quality of medical devices and in vitro diagnostics in resource-limited settings                   | Journal article<br><i>Tropical medicine and International Health</i> | Resource limited settings/Global South countries                                                                                             | The paper describes evidence of quality problems of MDs or IVDs in resource-limited settings and regulatory challenges obtained through literature review, observations and surveys.                                                                                                                                                                     |
| Wong et al (2014) <sup>42</sup>    | HIV self-testing in resource-limited settings: Regulatory and policy considerations                | Journal article<br><i>AIDS and Behavior</i>                          | Resource limited settings                                                                                                                    | To examine regulatory and policy issues with HIVST, and similar self-diagnostic devices.                                                                                                                                                                                                                                                                 |
| Rugera et al (2014) <sup>43</sup>  | Regulation of medical diagnostics and medical devices in the East African community partner states | Journal article<br><i>BMC Health Services Research</i>               | East African Community (EAC) a regional inter- governmental organization of five Partner States: Kenya, Uganda, Burundi, Tanzania and Rwanda | To assess capacity and current practices across the Partner States for regulation of medical diagnostics (including In-vitro Diagnostics) and medical devices. Questions were framed to collect data on each of the essential features of a regulatory program for medical devices as described in guidelines published by the World Health Organisation |

|                                                |                                                                                                                  |                  |          |                                                                                                                                                                                                                                                                                                                                                   |
|------------------------------------------------|------------------------------------------------------------------------------------------------------------------|------------------|----------|---------------------------------------------------------------------------------------------------------------------------------------------------------------------------------------------------------------------------------------------------------------------------------------------------------------------------------------------------|
| WHO (2020) <sup>44</sup>                       | Guidance for post-market surveillance and market surveillance of medical devices, including in vitro diagnostics | Guideline/report | Global   | Describes objectives and processes for post-market surveillance for medical devices conducted by manufacturers with the assistance of their economic operators, as well as market surveillance conducted by regulators, and the role of other stakeholders in these processes.                                                                    |
| World Health Organization (2003) <sup>45</sup> | Medical device regulations: Global overview and guiding principles.                                              | Guideline/report | Global   | To provide guidance to Member states to set up or modify national regulatory systems for medical devices.                                                                                                                                                                                                                                         |
| WHO (2017) <sup>46</sup>                       | Global Model Regulatory Framework for Medical Devices including in vitro diagnostic medical devices.             | Guideline/report | Global   | Intended to provide guidance and support to WHO Member States that have yet to develop and implement regulatory controls relating to medical devices, as well as to jurisdictions that are continuing to improve their regulatory frameworks as they take steps to ensure the quality and safety of medical devices available in their countries. |
| WHO (2016) <sup>47</sup>                       | Medical device regulatory systems at country level                                                               | Report           | Egypt    | Brief description of the medical device regulatory system                                                                                                                                                                                                                                                                                         |
| WHO (2016) <sup>48</sup>                       | Medical device regulatory systems at country level                                                               | Report           | Ethiopia | Brief description of the medical device regulatory system                                                                                                                                                                                                                                                                                         |
| WHO (2016) <sup>49</sup>                       | Medical device regulatory systems at country level                                                               | Report           | Ghana    | Brief description of the medical device regulatory system                                                                                                                                                                                                                                                                                         |

|                          |                                                    |        |              |                                                           |
|--------------------------|----------------------------------------------------|--------|--------------|-----------------------------------------------------------|
| WHO (2016) <sup>50</sup> | Medical device regulatory systems at country level | Report | Togo         | Brief description of the medical device regulatory system |
| WHO (2016) <sup>51</sup> | Medical device regulatory systems at country level | Report | Nigeria      | Brief description of the medical device regulatory system |
| WHO (2016) <sup>52</sup> | Medical device regulatory systems at country level | Report | Zimbabwe     | Brief description of the medical device regulatory system |
| WHO (2016) <sup>53</sup> | Medical device regulatory systems at country level | Report | Libya        | Brief description of the medical device regulatory system |
| WHO (2016) <sup>54</sup> | Medical device regulatory systems at country level | Report | Namibia      | Brief description of the medical device regulatory system |
| WHO (2016) <sup>55</sup> | Medical device regulatory systems at country level | Report | Cabo Verde   | Brief description of the medical device regulatory system |
| WHO (2016) <sup>56</sup> | Medical device regulatory systems at country level | Report | Tanzania     | Brief description of the medical device regulatory system |
| WHO (2016) <sup>57</sup> | Medical device regulatory systems at country level | Report | Kenya        | Brief description of the medical device regulatory system |
| WHO (2016) <sup>58</sup> | Medical device regulatory systems at country level | Report | Burkina Faso | Brief description of the medical device regulatory system |
| WHO (2016) <sup>59</sup> | Medical device regulatory systems at country level | Report | Algeria      | Brief description of the medical device regulatory system |

|                                     |                                                                                                                  |                   |                                                                     |                                                                                                                                                                                    |
|-------------------------------------|------------------------------------------------------------------------------------------------------------------|-------------------|---------------------------------------------------------------------|------------------------------------------------------------------------------------------------------------------------------------------------------------------------------------|
| Peeling Rosana (2015) <sup>60</sup> | Update on Regional Harmonization of Diagnostic Regulation in Africa                                              | Report            | Africa                                                              | Update on harmonization efforts to improve regulatory oversight for diagnostic devices in Africa                                                                                   |
| WHO (2016) <sup>61</sup>            | Medical device regulatory systems at country level                                                               | Report            | South Africa                                                        | Brief description of the medical device regulatory system                                                                                                                          |
| WHO (2016) <sup>62</sup>            | Medical device regulatory systems at country level                                                               | Report            | Madagascar                                                          | Brief description of the medical device regulatory system                                                                                                                          |
| WHO (2016) <sup>63</sup>            | Medical device regulatory systems at country level                                                               | Report            | Sierra Leone                                                        | Brief description of the medical device regulatory system                                                                                                                          |
| WHO (2016) <sup>64</sup>            | Medical device regulatory systems at country level                                                               | Report            | Morocco                                                             | Brief description of the medical device regulatory system                                                                                                                          |
| WHO (2016) <sup>65</sup>            | Medical device regulatory systems at country level                                                               | Report            | Sudan                                                               | Brief description of the medical device regulatory system                                                                                                                          |
| WHO (2016) <sup>66</sup>            | Medical device regulatory systems at country level                                                               | Report            | Zambia                                                              | Brief description of the medical device regulatory system                                                                                                                          |
| WHO (2016) <sup>67</sup>            | Medical device regulatory systems at country level                                                               | Report            | Rwanda                                                              | Brief description of the medical device regulatory system                                                                                                                          |
| Lissel et al (2016) <sup>68</sup>   | Conference proceedings: Annual International Conference of the IEEE Engineering in Medicine and Biology Society. | Conference report | African Biomedical Engineering Consortium (ABEC) partner countries. | This paper focuses on the development of an affordable and sustainable system for medical device regulations to provide safe, effective and quality healthcare products for Africa |

|                                                                    |                                                                                                    |                                                   |                                                              |                                                                                                                                                                                                                                                               |
|--------------------------------------------------------------------|----------------------------------------------------------------------------------------------------|---------------------------------------------------|--------------------------------------------------------------|---------------------------------------------------------------------------------------------------------------------------------------------------------------------------------------------------------------------------------------------------------------|
| Piaggio et al (2020) <sup>69</sup>                                 | Donation of Medical Devices in Low-Income Countries: Preliminary Results from Field Studies        | Conference reports<br>IFMBE Proceedings 73        | Sub-Saharan Africa                                           | Undertake field studies in 3 sub-Saharan countries towards understanding some of the reasons behind the non-use or the breakage of the MDs.                                                                                                                   |
| Saidi and Douglas (2016) <sup>70</sup>                             | Medical device regulation in Africa                                                                | Book Chapter<br>Biomedical Engineering For Africa | Africa                                                       | To provide an overview of international standards and regulations for medical devices focused on focus on the ten African countries with the highest GDP – Kenya, Nigeria, Egypt, Sudan, Morocco, Angola, Algeria, Tanzania, Ethiopia and South Africa        |
| Dusabe Gloria (2020) <sup>71</sup>                                 | <i>Doctoral disseration University of Malta/Regulation of medical devices in Europe and Africa</i> | Dissertation/thesis                               | Europe and Africa: Ghana, Kenya, Rwanda, Tanzania and Uganda | To evaluate the regulations and guidelines for medical devices in Europe (Germany and Switzerland) and five countries in Africa, namely, Uganda, Kenya, Tanzania, Rwanda and Ghana with the aim of identifying gaps and proposing strategies for improvement. |
| African Union Development Agency [AUDA-NEPAD] (2019) <sup>72</sup> | Africa Medical Devices Forum (AMDF)                                                                | Webpage                                           | Africa                                                       | To establish a harmonized framework for regulation of medical devices including in vitro diagnostics in Africa based on the WHO global model for Medical Devices Regulatory Framework Model.                                                                  |

\*Citation number as it appears on the manuscript reference list is in superscript.
