# Supplementary material
Source: HighWire-hosted journal article supplement (https://gh.bmj.com/content/8/8/e012308)
Supplement: inline-supplementary-material-5 [file inline-supplementary-material-5.pdf]

**TableS2: Mapping of details of medical device governance including regulation and oversight from included literature.**

| Author/<br>Year                          | Medical<br>Device<br>definition                                                                                                                                                          | Medical<br>device<br>classification<br>system                                                                                                                                                                                                                                                                                                                                                                     | Availability<br>of legal<br>framework                                                                                                                                                                                                                                                | Pre-<br>market<br>phase                                                                                                                                                                                                                                                                                                                  | Placing-<br>on-market<br>phase                                                                                                                                                                                                                                                                                                                                 | Post-<br>market<br>phase | Other details of<br>governance/<br>oversight                                                                                                                                                                                                                                                                                                                                                                                                                                                      | Other details<br>of<br>governance/<br>oversight                                                                                                                                                                                                                                                                                                                                                                                 | Policy/guide<br>lines for<br>donated<br>MDs                                                                                                 | Actors<br>involved                                                                                                                                                                                                                              | Regulatory<br>and other<br>governance<br>challenges                                                                                                                                                                                                                | Opportunities to<br>improve<br>governance/<br>regulation                                                                                                                                                                                                                                                                                                                                                                                                                                            |
|------------------------------------------|------------------------------------------------------------------------------------------------------------------------------------------------------------------------------------------|-------------------------------------------------------------------------------------------------------------------------------------------------------------------------------------------------------------------------------------------------------------------------------------------------------------------------------------------------------------------------------------------------------------------|--------------------------------------------------------------------------------------------------------------------------------------------------------------------------------------------------------------------------------------------------------------------------------------|------------------------------------------------------------------------------------------------------------------------------------------------------------------------------------------------------------------------------------------------------------------------------------------------------------------------------------------|----------------------------------------------------------------------------------------------------------------------------------------------------------------------------------------------------------------------------------------------------------------------------------------------------------------------------------------------------------------|--------------------------|---------------------------------------------------------------------------------------------------------------------------------------------------------------------------------------------------------------------------------------------------------------------------------------------------------------------------------------------------------------------------------------------------------------------------------------------------------------------------------------------------|---------------------------------------------------------------------------------------------------------------------------------------------------------------------------------------------------------------------------------------------------------------------------------------------------------------------------------------------------------------------------------------------------------------------------------|---------------------------------------------------------------------------------------------------------------------------------------------|-------------------------------------------------------------------------------------------------------------------------------------------------------------------------------------------------------------------------------------------------|--------------------------------------------------------------------------------------------------------------------------------------------------------------------------------------------------------------------------------------------------------------------|-----------------------------------------------------------------------------------------------------------------------------------------------------------------------------------------------------------------------------------------------------------------------------------------------------------------------------------------------------------------------------------------------------------------------------------------------------------------------------------------------------|
| DeMaria<br>et al <sup>34</sup><br>(2018) | A medical<br>device can<br>be<br>described<br>as any<br>means of<br>improving<br>or<br>monitoring<br>patient<br>health that<br>acts on the<br>body in a<br>non-<br>metabolic<br>fashion. | 8 countries<br>reviewed<br>(Egypt, SA,<br>Nigeria,<br>Uganda,<br>Ethiopia,<br>Malawi,<br>Tanzania and<br>Kenya). Only<br>Malawi had<br>no<br>information.<br>All 7 countries<br>used a 4 tier<br>classification<br>system<br>modelled<br>after the GHTF<br>A-D or the EU<br>I-III system. A<br>or I<br>representing<br>the lowest<br>hazard devices<br>and D or III<br>representing<br>highest hazard<br>devices. | All countries<br>studied<br>(except<br>Malawi)<br>have<br>national<br>laws/legislati<br>on in place<br>relating to<br>medical<br>device<br>regulation.<br>Most<br>countries<br>had oriented<br>regulatory<br>processes in<br>the<br>EU directives<br>mainly or<br>FDA<br>directives. | In most<br>countries,<br>the MoH<br>or a<br>National<br>Regulatory<br>Authority<br>regulate<br>local<br>manufactu<br>re.<br>Legislation<br>sets<br>document<br>ed<br>technical<br>standards<br>or norms<br>which<br>provide<br>specificati<br>ons,<br>guidelines<br>or<br>characteri<br>stics,<br>including<br>testing<br>methods<br>and | Countries<br>may not<br>have the<br>capacity to<br>test safety<br>and<br>performan<br>ce of many<br>devices. To<br>market<br>MDs<br>within a<br>country,<br>certificatio<br>n is<br>required.<br>This<br>includes a<br>free sale<br>certificate<br>and CE<br>mark or<br>FDA<br>approval<br>(Egypt,<br>Kenya,<br>Nigeria,<br>SA) and<br>Product<br>certificatio | No details               | Coupled with a<br>proliferation of<br>MDS and<br>varying<br>regulatory<br>processes, the<br>differences in<br>regulations<br>between<br>countries oblige<br>manufacturers<br>to prepare a<br>different dossier<br>for each<br>country, which<br>constitutes a<br>lengthy and<br>costly process,<br>leading to a<br>disincentive to<br>medical device<br>companies to<br>sell in some<br>countries. They<br>are also a<br>deterrent to<br>innovation and<br>the<br>development of<br>new products. | A core<br>requirement<br>for regulation<br>is the<br>evaluation of<br>intrinsic risk<br>and expected<br>benefit of all<br>medical<br>devices.<br>According to<br>the intended<br>use, length of<br>time used,<br>interaction<br>with the<br>human body<br>and other<br>technical<br>characteristics<br>, the device is<br>considered<br>more or less<br>risky for the<br>patient and<br>therefore<br>classified<br>accordingly. | All 8<br>countries in<br>Africa<br>reported to<br>have had a<br>policy or<br>guideline for<br>donated<br>MDS but no<br>details<br>provided. | NRA's,<br>IMDRF,<br>GHTF,<br>FDA, EU<br>ABEC-<br>African<br>Biomedic<br>al<br>Engineer<br>s<br>Consorti<br>um<br>formed<br>to<br>improve<br>capacity<br>of<br>biomed<br>engineer<br>s to<br>regulate<br>health<br>products<br>including<br>MDs. | Despite<br>having<br>legislation to<br>guide<br>regulatory<br>processes,<br>most<br>countries<br>had limited<br>capacity to<br>carry out<br>regulation of<br>medical<br>devices due<br>to lack of<br>investment<br>and<br>knowledge<br>and skills of<br>personnel. | Harmonizing<br>regulations:<br>Regulatory<br>authorities will<br>benefit in terms<br>of improved<br>expertise,<br>collaboration with<br>other regulatory<br>authorities and<br>operational<br>efficiency through<br>sharing of<br>information and<br>recognition of<br>established<br>regulatory<br>authority<br>decisions. "Open<br>source medical<br>devices"- reduce<br>cost of<br>development<br>while maintaining<br>regulatory<br>processes and<br>safety levels<br>similar to EU<br>devices. |

|                                    |                                                                                                                                                                                                                   |                                                                                                                                                                                                                                                                       |            |                                                                                                                                                                                                        |                                                                                                                                                                                                 |                                                                                                                                                                                      |                                                                                                                                                                                                                                                                                                    |                                                                                                                                                                                                                                             |            |                                                                                                                                                             |                                                                                                                                                                                                                                              |                                                                                                                                                                                                                                                                                                                                         |
|------------------------------------|-------------------------------------------------------------------------------------------------------------------------------------------------------------------------------------------------------------------|-----------------------------------------------------------------------------------------------------------------------------------------------------------------------------------------------------------------------------------------------------------------------|------------|--------------------------------------------------------------------------------------------------------------------------------------------------------------------------------------------------------|-------------------------------------------------------------------------------------------------------------------------------------------------------------------------------------------------|--------------------------------------------------------------------------------------------------------------------------------------------------------------------------------------|----------------------------------------------------------------------------------------------------------------------------------------------------------------------------------------------------------------------------------------------------------------------------------------------------|---------------------------------------------------------------------------------------------------------------------------------------------------------------------------------------------------------------------------------------------|------------|-------------------------------------------------------------------------------------------------------------------------------------------------------------|----------------------------------------------------------------------------------------------------------------------------------------------------------------------------------------------------------------------------------------------|-----------------------------------------------------------------------------------------------------------------------------------------------------------------------------------------------------------------------------------------------------------------------------------------------------------------------------------------|
|                                    |                                                                                                                                                                                                                   |                                                                                                                                                                                                                                                                       |            | acceptance criteria, for the design and manufacturing of medical devices.                                                                                                                              | and pre-shipment verification of conformity certification based on relevant ISO standards (Uganda).                                                                                             |                                                                                                                                                                                      |                                                                                                                                                                                                                                                                                                    |                                                                                                                                                                                                                                             |            |                                                                                                                                                             |                                                                                                                                                                                                                                              |                                                                                                                                                                                                                                                                                                                                         |
| Dacombe et al <sup>35</sup> (2019) | None provided. HIVST kits are classed as in vitro diagnostic (IVD), that is tests on specimens taken from the body, and thus are considered medical devices by the International Medical Device Regulation Forum. | Medical devices are classified according to the hazard the device presents based on its intended use and the expertise of the user and the impact of the result. Due to the potentially severe outcomes of an incorrect result and its use by lay persons, regulators | No details | Unclear. Surveys of regulation across Africa have identified IVD regulation as a neglected area. Development of regulation for IVDs in the 3 countries ranged from none in one country (Malawi) to the | HIVSTs must not demonstrate the stability and accuracy required for device registration, but also take into account mechanisms for ensuring the kit performs optimally in the hands of intended | Many low- and middle-income countries and donors use WHO PQ as a prerequisite or substitution for device registration. However, PQ does not cover all monitoring of device performan | In Africa, external quality assurance programmes are largely run by the tertiary referral/national laboratories or reference laboratories and act as a post-market surveillance system in the absence of or, where available, in collaboration with IVD regulators. However, the potential role in | WHO pre-qualification was recognized across all countries, as an important mechanism for ensuring the quality of test kits from manufacturers. Little mention of the existence of any regional participants were aware of the benefits of a | No details | MoH policy makers, medicine regulatory authorities, Laboratory staff, central pharmacy stores, WHO/UN, donors, reference labs, National Bureau of Standards | Across all three countries, knowledge and understanding of IVD regulation and HIVST was limited. It was unclear to respondents who had the mandate for regulation, with several actors reported as involved in regulation. Regulators in all | All countries recognise the need for improved coordination of IVD regulations. Respondents recognised weak coordination between ministries of health, regulators and national reference laboratories and more interaction and collaboration was needed. Technical working groups with a mandate to focus on HIVST were seen as a way of |

|                                                                                                                                        |                                                                              |                                                                                                                                                                                                                                                                         |                                                                                                                               |                                                                               |                                                   |                                                                                                                                                                                                                                                                                                                                                                                             |                                                                                                                            |
|----------------------------------------------------------------------------------------------------------------------------------------|------------------------------------------------------------------------------|-------------------------------------------------------------------------------------------------------------------------------------------------------------------------------------------------------------------------------------------------------------------------|-------------------------------------------------------------------------------------------------------------------------------|-------------------------------------------------------------------------------|---------------------------------------------------|---------------------------------------------------------------------------------------------------------------------------------------------------------------------------------------------------------------------------------------------------------------------------------------------------------------------------------------------------------------------------------------------|----------------------------------------------------------------------------------------------------------------------------|
| would likely consider HIVST kits as a Class D (highest risk) medical device and therefore subject to the greatest degree of regulation | drafting of guidelines for pre-market regulation in the other two countries. | users. In developed countries, this process takes years. To speed up this process and make the evaluation more focused on low- and middle-income countries, in 2016, the WHO released the technical specifications series for the pre-qualification (PQ) of HIVST kits. | ce undertaken once a device is on the market (post-market surveillance) though an adverse event reporting system is in place. | post-market surveillance of HIVST had not been recognized by most regulators. | shared approach and were open to the possibility. | countries expressed a need for more support to develop IVD regulations. None of the countries had regulations that entirely covered the regulation of IVDs or any specific guidance on HIVST regulation. A key concern was the potential entry of unregulated and risk of poor quality HIVST kits (particularly their performance in the hands of intended users) into the domestic market, | coordinating the development of policy and regulation while MOUs could serve as a way for different orgs to work together. |
|----------------------------------------------------------------------------------------------------------------------------------------|------------------------------------------------------------------------------|-------------------------------------------------------------------------------------------------------------------------------------------------------------------------------------------------------------------------------------------------------------------------|-------------------------------------------------------------------------------------------------------------------------------|-------------------------------------------------------------------------------|---------------------------------------------------|---------------------------------------------------------------------------------------------------------------------------------------------------------------------------------------------------------------------------------------------------------------------------------------------------------------------------------------------------------------------------------------------|----------------------------------------------------------------------------------------------------------------------------|

|                                       |            |                 |                                                                                                     |                                                                                                                                                                                                                                            |                                                                                                                                                                                      |                     |                                                                                                                                                    |                                                                                                                                                                                                                                                                                                                |            |       |                                                                                                                                                                                                                                     |                                                                                                                                                                                                                                                                                                            |
|---------------------------------------|------------|-----------------|-----------------------------------------------------------------------------------------------------|--------------------------------------------------------------------------------------------------------------------------------------------------------------------------------------------------------------------------------------------|--------------------------------------------------------------------------------------------------------------------------------------------------------------------------------------|---------------------|----------------------------------------------------------------------------------------------------------------------------------------------------|----------------------------------------------------------------------------------------------------------------------------------------------------------------------------------------------------------------------------------------------------------------------------------------------------------------|------------|-------|-------------------------------------------------------------------------------------------------------------------------------------------------------------------------------------------------------------------------------------|------------------------------------------------------------------------------------------------------------------------------------------------------------------------------------------------------------------------------------------------------------------------------------------------------------|
|                                       |            |                 |                                                                                                     |                                                                                                                                                                                                                                            |                                                                                                                                                                                      |                     |                                                                                                                                                    |                                                                                                                                                                                                                                                                                                                |            |       | mainly through the private sector.                                                                                                                                                                                                  |                                                                                                                                                                                                                                                                                                            |
| Dube-Mwezi et al <sup>36</sup> (2020) | No details | None specified. | 7 countries within the region were reported to have a normative legal framework for medical devices | Reliance on the technical reports of the notified bodies in producing regulatory outcomes (in some cases with specialised multi-disciplinary expertise required to ensure appropriate oversight of their safety, quality and performance). | The regulation of medical devices mainly focused on registration and licencing (import and export) control, and to a lesser extent clinical testing and post marketing surveillance. | see previous column | Essential and complementary medicines constituted the greater part of the product regulation for the majority of NMRA compared to medical devices. | Efforts have been focused on strengthening regulatory frameworks for medicines, whilst focus on medical devices and in vitro diagnostics (IVDs) has not been equally high. Investing more efforts into strengthening frameworks for medical devices could be recommended as a priority for the SADC countries. | No details | NMRAs | Need to transition from the broad strengthening of the regulatory systems in terms of the scope and type of product, as well as specialisation of the regulatory functions. for example, other targeted forms of pharmacovigilance. | The core functions of NMRA need to be expanded across the region, and in particular, to include product-specific expertise. It is also critical to bridge the gaps by making the mandate of the regulatory authorities comprehensive to encompass all types of medical products including medical devices. |

|                                   |                        |                                                                                                                                                                                                                                      |                                                                                                                                                                                                                                                                                                                                                                      |                                                                                                                                                                                                                                                                                                                              |                                                                                                                                                                                                                                                                                                                   |                                                                                                                                                                                                                                                                                                                             |                                                                                                                                                                                                                                                                                                                                                                                                                                                                                                |                                                                                                                                                                                                                                                                                            |                                                                              |      |                                                                                                                                                                                                                                                                                                                                                         |                                                                                                                                                                                                                                                                                                                                                                                           |
|-----------------------------------|------------------------|--------------------------------------------------------------------------------------------------------------------------------------------------------------------------------------------------------------------------------------|----------------------------------------------------------------------------------------------------------------------------------------------------------------------------------------------------------------------------------------------------------------------------------------------------------------------------------------------------------------------|------------------------------------------------------------------------------------------------------------------------------------------------------------------------------------------------------------------------------------------------------------------------------------------------------------------------------|-------------------------------------------------------------------------------------------------------------------------------------------------------------------------------------------------------------------------------------------------------------------------------------------------------------------|-----------------------------------------------------------------------------------------------------------------------------------------------------------------------------------------------------------------------------------------------------------------------------------------------------------------------------|------------------------------------------------------------------------------------------------------------------------------------------------------------------------------------------------------------------------------------------------------------------------------------------------------------------------------------------------------------------------------------------------------------------------------------------------------------------------------------------------|--------------------------------------------------------------------------------------------------------------------------------------------------------------------------------------------------------------------------------------------------------------------------------------------|------------------------------------------------------------------------------|------|---------------------------------------------------------------------------------------------------------------------------------------------------------------------------------------------------------------------------------------------------------------------------------------------------------------------------------------------------------|-------------------------------------------------------------------------------------------------------------------------------------------------------------------------------------------------------------------------------------------------------------------------------------------------------------------------------------------------------------------------------------------|
| Hubner et al <sup>37</sup> (2021) | Same as WHO definition | Most countries used a 4 tier risk based classification system in line with WHO or GHTF recommendations. South Africa was the only country that includes specific guidelines governing the regulation of in vitro diagnostic devices. | All COSECSA member countries, and South Africa, with the exception of Burundi, Malawi and Mozambique have legislation mandating the regulation of medical devices. SA's framework closely resembles IMDRF guidelines while other countries like Zimbabwe, Rwanda, South Sudan and Burundi use a more limited legal framework restricted to the mention/definition of | Conformity assessment requirements varied between countries. Countries like SA, Kenya, Tzn require device vendors to demonstrate conformity to WHO guidelines or to a quality management system used in IMDRF countries. Other countries like Zimbabwe focus on assessment of devices such as gloves and condoms due largely | Many countries require devices, manufacturers, importers, and distributors to be registered with the national medicines regulatory authorities only requires this for vendors of condoms and gloves. In addition, over half of the countries had import controls in place to ensure MDs are approved before their | SA employs extensive post market controls including inspection per quality management systems and procedures and guidelines, the seizure of devices that are unregistered or expired, reporting of adverse events, and controls of labeling and advertising. Other countries (Kenya, Ethiopia, Sudan, Tanzania, Uganda, and | Regulatory oversight for MDs in African countries remains limited and not well defined. Many countries look to international guidance such as from US FDA and EMA. These processes are stringent but costly and may discourage local manufacturers and developers. They may not be well suited for needs and issues of African settings. All countries except Mozambique (uses MoH) had a national regulatory authority which regulated medical devices. The practical enforcement capacity of | Underdeveloped regulatory processes present challenges for businesses and manufacturers of new medical devices interested in entering the African market, as regulatory processes are country-dependent thus requires evaluating local laws and regulations on a country-by-country basis. | Implied as imported devices in the paper to which import controls will apply | NRAs | The majority of COSECSA member countries currently do not effectively regulate medical devices, due both to underdeveloped regulatory frameworks and a lack of downstream enforcement. Using FDA and EU approvals can be challenging as the review process may not consider infrastructural limitations currently present in many African nations. Many | Approaches to build state capability and subsequently expand the capacity of COSECSA member countries to regulate the marketing of medical devices include: an institutional approach which encourages the implementation of "best practices" from developed countries with a focus on improving regulatory capacity, but this is critiqued for not prioritizing country specific issues. |
|-----------------------------------|------------------------|--------------------------------------------------------------------------------------------------------------------------------------------------------------------------------------------------------------------------------------|----------------------------------------------------------------------------------------------------------------------------------------------------------------------------------------------------------------------------------------------------------------------------------------------------------------------------------------------------------------------|------------------------------------------------------------------------------------------------------------------------------------------------------------------------------------------------------------------------------------------------------------------------------------------------------------------------------|-------------------------------------------------------------------------------------------------------------------------------------------------------------------------------------------------------------------------------------------------------------------------------------------------------------------|-----------------------------------------------------------------------------------------------------------------------------------------------------------------------------------------------------------------------------------------------------------------------------------------------------------------------------|------------------------------------------------------------------------------------------------------------------------------------------------------------------------------------------------------------------------------------------------------------------------------------------------------------------------------------------------------------------------------------------------------------------------------------------------------------------------------------------------|--------------------------------------------------------------------------------------------------------------------------------------------------------------------------------------------------------------------------------------------------------------------------------------------|------------------------------------------------------------------------------|------|---------------------------------------------------------------------------------------------------------------------------------------------------------------------------------------------------------------------------------------------------------------------------------------------------------------------------------------------------------|-------------------------------------------------------------------------------------------------------------------------------------------------------------------------------------------------------------------------------------------------------------------------------------------------------------------------------------------------------------------------------------------|

|                                    |               |                                                                                                                                                                                                                                                                               |                                                                                              |                                                                                                                                                                                                                |                                                                                                                                                                                   |                                                                                                                   |                                                                                                                                                                                                                                                                                                       |            |                                                   |                                                                                                                                                                                                                                   |
|------------------------------------|---------------|-------------------------------------------------------------------------------------------------------------------------------------------------------------------------------------------------------------------------------------------------------------------------------|----------------------------------------------------------------------------------------------|----------------------------------------------------------------------------------------------------------------------------------------------------------------------------------------------------------------|-----------------------------------------------------------------------------------------------------------------------------------------------------------------------------------|-------------------------------------------------------------------------------------------------------------------|-------------------------------------------------------------------------------------------------------------------------------------------------------------------------------------------------------------------------------------------------------------------------------------------------------|------------|---------------------------------------------------|-----------------------------------------------------------------------------------------------------------------------------------------------------------------------------------------------------------------------------------|
|                                    |               |                                                                                                                                                                                                                                                                               | medical devices, but does not assign specific responsibilities or guidelines for regulation. | to their role in preventing the transmission of HIV/AIDS.                                                                                                                                                      | shipment and entry                                                                                                                                                                | Zambia) likewise have postmarket controls to varying degrees related to inspection but limited details available. | these bodies however remains limited.                                                                                                                                                                                                                                                                 |            |                                                   | medical devices designed to meet the standards of other countries have been observed to easily malfunction due to such factors.                                                                                                   |
| Kedwani et al <sup>38</sup> (2019) | None provided | Most countries use a 3-4 tier based system. Risk is a combination of the probability of occurrence of any harm and severity of that harm. Two classification systems are used- either rule-based, or group-based. The former defines specific rules, which must be applied to | No details                                                                                   | Manufacturers require product registration and need to determine the national regulatory requirements and if market placement is possible. This is challenged by limited information sources. The diversity of | All manufacturers looking to place a product on a market should develop technical dossier and at least include the requirements of well-known harmonization groups such as IMDRF. | No specific details                                                                                               | There is a gap between developed countries with stringent regulatory requirements for MDs and developing countries with limited to no regulations. Most national regulatory frameworks are concerned with protecting the population from harm. Generally, resources are focused on high risk products | No details | NRAs, manufacturers, harmonization working groups | Predominantly, the regulation of (MDs) and (IVDs) in Africa is weakly defined. Trained personnel or laboratory facilities for the correct handling of some diagnostic tests are often missing. Regulations are reinforced for MDs |

identify the final risk classification. The latter defines product groups which are already assigned to a risk class. By the assignment to a product group the risk class can be determined.

the regulatory requirements across African countries complicate product registration.

with minimal control for low risk products, but these may come with some challenges to quality and safety.

used in specific infectious diseases such as tuberculosis, malaria or HIV/AIDS, due to the support of donor organizations

|                                          |                                                                                                                                                                                                                                                                                                                  |                                                                                                                                                                                                                                                                                                                                                                                        |            |                                                                                                                                                                                                                                                                                                      |                                                                                                                                                                                                                                                                                                                                  |                                                                                                                                                                                                                                                                       |                                                                                                                             |                                                                                                                                                                                                                                                                                                                                                                                                               |            |                                                                                      |                                                                                                                                                                                                                                                                                                                          |                                                                                                                                                                                                                                                                                                                                                                                                                                                                                                                             |
|------------------------------------------|------------------------------------------------------------------------------------------------------------------------------------------------------------------------------------------------------------------------------------------------------------------------------------------------------------------|----------------------------------------------------------------------------------------------------------------------------------------------------------------------------------------------------------------------------------------------------------------------------------------------------------------------------------------------------------------------------------------|------------|------------------------------------------------------------------------------------------------------------------------------------------------------------------------------------------------------------------------------------------------------------------------------------------------------|----------------------------------------------------------------------------------------------------------------------------------------------------------------------------------------------------------------------------------------------------------------------------------------------------------------------------------|-----------------------------------------------------------------------------------------------------------------------------------------------------------------------------------------------------------------------------------------------------------------------|-----------------------------------------------------------------------------------------------------------------------------|---------------------------------------------------------------------------------------------------------------------------------------------------------------------------------------------------------------------------------------------------------------------------------------------------------------------------------------------------------------------------------------------------------------|------------|--------------------------------------------------------------------------------------|--------------------------------------------------------------------------------------------------------------------------------------------------------------------------------------------------------------------------------------------------------------------------------------------------------------------------|-----------------------------------------------------------------------------------------------------------------------------------------------------------------------------------------------------------------------------------------------------------------------------------------------------------------------------------------------------------------------------------------------------------------------------------------------------------------------------------------------------------------------------|
| McNerny and Peeling <sup>39</sup> (2015) | No definition given but MDs broadly categorise d: (1) active implantable (eg, cardiac pacemakers); (2) general medical devices (eg, scalpels and scanners); and (3) in vitro diagnostics (IVDs). The major distinction between the 3 categories is that IVDs use specimens taken from the body whereas the other | Most NRAs adopt a 3-4 tier risk classification system ranging from low, moderate and high risk, where risk is a combination of the severity of harm and the probability of its occurrence. Regulators need to decide whether the potential benefits of using a medical device or IVD outweigh the potential risks to both the individual (personal health) and to the public's health. | No details | Manufacturers seeking pre-market approval for a high risk diagnostic test would be required to submit a dossier compiling a full description of the product, the manufacturing process, a statement of intended use, copies of package inserts and instructions, and evidence of analytical accuracy | Mainly advertising controls that prevent misleading claims about test performance and ensure clarity of intended use. African NRAs may take WHO prequalification, or approval by well-established NRAs such as the FDA and European Union (CE marking), into consideration when reviewing applications, thereby accelerating the | Post market vigilance ensures that satisfactory quality is maintained throughout the life of a product, either by active surveillance measures, such as batch testing to check quality, or by monitoring complaints. No details of whether this occurs in the region. | Other risks for diagnostic tests to consider in regulatory assessments is the risk of incorrect or misleading test results. | In the absence of formal transparent mechanisms for regulatory control, some national disease control programs or Ministries of Health oblige companies to undertake product evaluation studies in a local laboratory, which can result in unnecessary and costly duplication. Tensions were evident between organizations whose primary function was to oversee the technical personnel in such laboratories | No details | NRAs, Pan African Harmonization working party (PAHWP), EU regulatory bodies and FDA. | The current regulatory landscape for diagnostic tests in developing countries acts as a disincentive to innovation and a barrier to new diagnostic products entering those markets. Although most African countries have national bodies that oversee the registration of medicines, few have capacity to regulate IVDs. | Mainly through harmonization efforts to shorten approval process time and save costs. Transregional efforts through the Pan African Harmonisation Working Party on medical devices and diagnostics (PAHWP)- a voluntary body that aims to improve access to safe and affordable medical devices and diagnostics in Africa through harmonized regulation. Priorities include establishing a laboratory network and communications platform for postmarketing surveillance activities and reducing unnecessary duplication in |
|------------------------------------------|------------------------------------------------------------------------------------------------------------------------------------------------------------------------------------------------------------------------------------------------------------------------------------------------------------------|----------------------------------------------------------------------------------------------------------------------------------------------------------------------------------------------------------------------------------------------------------------------------------------------------------------------------------------------------------------------------------------|------------|------------------------------------------------------------------------------------------------------------------------------------------------------------------------------------------------------------------------------------------------------------------------------------------------------|----------------------------------------------------------------------------------------------------------------------------------------------------------------------------------------------------------------------------------------------------------------------------------------------------------------------------------|-----------------------------------------------------------------------------------------------------------------------------------------------------------------------------------------------------------------------------------------------------------------------|-----------------------------------------------------------------------------------------------------------------------------|---------------------------------------------------------------------------------------------------------------------------------------------------------------------------------------------------------------------------------------------------------------------------------------------------------------------------------------------------------------------------------------------------------------|------------|--------------------------------------------------------------------------------------|--------------------------------------------------------------------------------------------------------------------------------------------------------------------------------------------------------------------------------------------------------------------------------------------------------------------------|-----------------------------------------------------------------------------------------------------------------------------------------------------------------------------------------------------------------------------------------------------------------------------------------------------------------------------------------------------------------------------------------------------------------------------------------------------------------------------------------------------------------------------|



medical devices are used either in contact with or implanted into the body

and clinical performance. The NRA will also examine the quality management system of the manufacturer, including reports from a site visit by a team of experts. Unclear which countries in the region require this.

process of placing on market.

and regulatory agencies whose primary activity was the regulation of medicines.

clinical performance studies. However, harmonized approval are yet to be a reality.

|                                    |                        |                                                                                                                                                                                                                                                                                                                                                              |                                                                                                                                                                                                                                 |                                                                                                                                                                                                                                                                                                                        |                                                                                                                                                                                                               |                                                                                                                                                                                                                                                                                                                         |                                                                                                                                                                                                                                                                                                                                                       |                                                                                                                                                                                                                                                                             |            |                                                                                                                               |                                                                                                                                                                                                                                                                                                                                                 |                                                                                                                                                                                                                                                                                                                    |
|------------------------------------|------------------------|--------------------------------------------------------------------------------------------------------------------------------------------------------------------------------------------------------------------------------------------------------------------------------------------------------------------------------------------------------------|---------------------------------------------------------------------------------------------------------------------------------------------------------------------------------------------------------------------------------|------------------------------------------------------------------------------------------------------------------------------------------------------------------------------------------------------------------------------------------------------------------------------------------------------------------------|---------------------------------------------------------------------------------------------------------------------------------------------------------------------------------------------------------------|-------------------------------------------------------------------------------------------------------------------------------------------------------------------------------------------------------------------------------------------------------------------------------------------------------------------------|-------------------------------------------------------------------------------------------------------------------------------------------------------------------------------------------------------------------------------------------------------------------------------------------------------------------------------------------------------|-----------------------------------------------------------------------------------------------------------------------------------------------------------------------------------------------------------------------------------------------------------------------------|------------|-------------------------------------------------------------------------------------------------------------------------------|-------------------------------------------------------------------------------------------------------------------------------------------------------------------------------------------------------------------------------------------------------------------------------------------------------------------------------------------------|--------------------------------------------------------------------------------------------------------------------------------------------------------------------------------------------------------------------------------------------------------------------------------------------------------------------|
| McNerny et al <sup>40</sup> (2014) | Same as WHO definition | GHTF classification according to risk of causing harm. Stringency of regulatory oversight required is related to the harm that a false positive or false negative test result may cause to either individual or public health. High risk tests require more stringent control, including evidence of their performance as obtained through clinical studies. | National Regulatory Authorities (NRAs) are usually mandated by law. Most countries have a legal framework and a nominated body to regulate medicines, but regulation of medical devices in developing countries is less common. | Pre-market evaluation to assess safety, performance, benefits and risks prior to market the device. Submission dossiers are unique to the country's regulatory framework and companies seeking approval to market an IVD are required to supply a dossier to the appropriate NRA describing the device and documenting | These stipulate conditions under which devices can be offered for sale; identify who may use the device and what conditions; avoid inappropriate marketing or misleading claims regarding test effectiveness. | Currently, there is limited capacity for post-market surveillance in much of the developing world. Systems for post-market surveillance for diagnostic devices are not implemented, reporting and information sharing occurs on an ad hoc basis. In many countries, random quality checks, such as lot testing, are not | Current regulatory oversight of IVDs is variable and, in countries where there is no regulation, substandard and counterfeit tests may be sold openly. In countries that do regulate, IVDs is often costly, lengthy and, on occasion, lacking in transparency, thus regulation of diagnostics is currently seen as a barrier to innovation and access | Current lack of standardisation across national regulatory authorities and the lack of clarity surrounding the regulatory pathways presents an unnecessary burden on manufacturers and acts as a deterrent to marketing in countries where financial returns may be modest. | No details | PAWHP members including national regulatory authorities, laboratories, experts, manufacturers and international organisations | In most African countries, submission dossiers are unique to the country, with each NRA utilising its own indicators, nomenclature and format in its own language. NRAs in the developing world lack the expertise and capacity required in order to undertake audits of manufacturing facilities which ultimately results in delayed approval. | For IVDs used in developing countries there are opportunities to streamline and harmonise activities where convergence of protocols and mutual recognition of other regulatory bodies could improve their safety and quality, accelerating access to new tests while simultaneously minimising the costs incurred. |
|------------------------------------|------------------------|--------------------------------------------------------------------------------------------------------------------------------------------------------------------------------------------------------------------------------------------------------------------------------------------------------------------------------------------------------------|---------------------------------------------------------------------------------------------------------------------------------------------------------------------------------------------------------------------------------|------------------------------------------------------------------------------------------------------------------------------------------------------------------------------------------------------------------------------------------------------------------------------------------------------------------------|---------------------------------------------------------------------------------------------------------------------------------------------------------------------------------------------------------------|-------------------------------------------------------------------------------------------------------------------------------------------------------------------------------------------------------------------------------------------------------------------------------------------------------------------------|-------------------------------------------------------------------------------------------------------------------------------------------------------------------------------------------------------------------------------------------------------------------------------------------------------------------------------------------------------|-----------------------------------------------------------------------------------------------------------------------------------------------------------------------------------------------------------------------------------------------------------------------------|------------|-------------------------------------------------------------------------------------------------------------------------------|-------------------------------------------------------------------------------------------------------------------------------------------------------------------------------------------------------------------------------------------------------------------------------------------------------------------------------------------------|--------------------------------------------------------------------------------------------------------------------------------------------------------------------------------------------------------------------------------------------------------------------------------------------------------------------|

evidence relating to the quality of manufacture, as well as the safety and stability of the components.

performed and tests can enter the market without checks on their quality. Most developing countries lack a feedback mechanism to provide manufacturers with information regarding the need for corrective action or mechanisms for withdrawal of substandard devices.

|                                 |                                                                                                                                                                                                                                                                |               |            |                                                                                                                                                                                                                                                                                                                             |                                                                                                                                                                                                                                                                                                                      |                                                                                                                                                                                                                                                                                                                                                                                                           |                |
|---------------------------------|----------------------------------------------------------------------------------------------------------------------------------------------------------------------------------------------------------------------------------------------------------------|---------------|------------|-----------------------------------------------------------------------------------------------------------------------------------------------------------------------------------------------------------------------------------------------------------------------------------------------------------------------------|----------------------------------------------------------------------------------------------------------------------------------------------------------------------------------------------------------------------------------------------------------------------------------------------------------------------|-----------------------------------------------------------------------------------------------------------------------------------------------------------------------------------------------------------------------------------------------------------------------------------------------------------------------------------------------------------------------------------------------------------|----------------|
| Mori et al <sup>41</sup> (2011) | Medical devices (MDs) and in vitro diagnostics (IVDs): medical instruments, apparatus or materials used on patients for surgery, treatment, or diagnosis. Unlike medicines, their intended primary action is not metabolic, immunological, or pharmacological. | Not specified | No details | Large gaps exist in terms of quality assurance of MDs and IVDs. Most resource-limited countries lack the means to ensure appropriate regulatory control and are more exposed to the risk of low-quality products. No definition of poor-quality products have been agreed for MDs /IVDs, making it more difficult to assess | Type of quality problems reported include the inappropriate use of sophisticated MDs /IVDs imported and used in tropical conditions, poor technical performance, mislabelling including falsified expiry dates. Poor regulatory oversight and limited awareness of the problem among caregivers and decision makers. | Regulatory definitions of counterfeit IVDs- deliberately mislabelled products (e.g. by expiry date or product identity label), whereas substandard IVDs are those that (i) do not meet the specifications described in the literature or claimed by the manufacturer (e.g. as listed in the product information sheet) and/or (ii) have apparent errors in labelling or on the product information sheet. | No information |
|---------------------------------|----------------------------------------------------------------------------------------------------------------------------------------------------------------------------------------------------------------------------------------------------------------|---------------|------------|-----------------------------------------------------------------------------------------------------------------------------------------------------------------------------------------------------------------------------------------------------------------------------------------------------------------------------|----------------------------------------------------------------------------------------------------------------------------------------------------------------------------------------------------------------------------------------------------------------------------------------------------------------------|-----------------------------------------------------------------------------------------------------------------------------------------------------------------------------------------------------------------------------------------------------------------------------------------------------------------------------------------------------------------------------------------------------------|----------------|

|                                 |                                            |                                                                                                                                                                                                                                            |                | their presence and their impact on global health.                                                                                                                                                                                                         |                                                                                                                                                                                                                                                    |                                                                                                                                                                                                                                                                                             |                                                                                                                                                                                                                                                                     |                                                                                                                                                                                                                                                                                                                                                                    |                |                                                                  |                                                                                                                                                                                                                                                                                                                                  |                                                                                                                                                                                                                                                                                                                                                                                                                                 |  |
|---------------------------------|--------------------------------------------|--------------------------------------------------------------------------------------------------------------------------------------------------------------------------------------------------------------------------------------------|----------------|-----------------------------------------------------------------------------------------------------------------------------------------------------------------------------------------------------------------------------------------------------------|----------------------------------------------------------------------------------------------------------------------------------------------------------------------------------------------------------------------------------------------------|---------------------------------------------------------------------------------------------------------------------------------------------------------------------------------------------------------------------------------------------------------------------------------------------|---------------------------------------------------------------------------------------------------------------------------------------------------------------------------------------------------------------------------------------------------------------------|--------------------------------------------------------------------------------------------------------------------------------------------------------------------------------------------------------------------------------------------------------------------------------------------------------------------------------------------------------------------|----------------|------------------------------------------------------------------|----------------------------------------------------------------------------------------------------------------------------------------------------------------------------------------------------------------------------------------------------------------------------------------------------------------------------------|---------------------------------------------------------------------------------------------------------------------------------------------------------------------------------------------------------------------------------------------------------------------------------------------------------------------------------------------------------------------------------------------------------------------------------|--|
| Wong et al <sup>42</sup> (2014) | Medical devices are as defined by the WHO. | HIV RDTs have been classified as “high risk devices”: results provided by these diagnostic devices have both serious individual and public health implications, and potential for harm due to false results (e.g. increased transmission). | No information | HIV self-diagnostics tests are legalised in Kenya and South Africa. n Kenya, HIV self-testing legalised since 2008 and included as part of national HIV testing policy. Should be subject to regulatory control but no specific guidelines are available. | Rapid HIV test kits are regulated within existing national policy frameworks, supported by WHO diagnostic pre-qualification and MOH validation of test kits. Currently no normative guidelines are available and no RDTs intended for self-testing | Tests are nationally approved only; vendor training and instruction are required. In Namibia and S/Africa, no specific guidelines, laws or policies for HIVST or quality of HIVST kits, although RDTs are regulated as medical devices. In all settings, private sector appears unregulated | Authors recommend HIVST regulatory oversight should include post-marketing surveillance to monitor the ongoing quality of tests sold, and laws that prevent low quality tests from entering the market. No specific guidelines available in the countries examined. | Increasingly, self-testing is also occurring through the private sector in resource-limited countries, where professional-use RDTs are varying packaged and sold directly to consumers. However, these services are often unregulated and not covered within national HIV policies, and the ability of governments to ensure appropriate, quality RDTs is limited. | No information | WHO, Ministries of Health and National disease control programs. | HIVST shows much promise, but regulations and policies still require adaptation to meet the specific challenges with RDT and self-tests. Regulatory frameworks supporting appropriate HIVST devices and self-testing implementation policies are both needed. Ensuring appropriate, safe, and effective diagnostics will require | Prioritise and strengthening regulatory infrastructures, longer-term strategies for strengthening country regulatory capacity for HIV diagnostics, including self-test RDTs. Others are policy development and decision-making related to the evaluation, sale or introduction of HIV rapid diagnostic tests intended for use by consumers. Regional regulatory-strengthening initiatives that support harmonised regulation of |  |

have been pre-qualified. Low resource countries considering HIVST will benefit from clear regulations and policies that ensure appropriate test kits are brought to market and quality will be ensured.

d, and it is legal for HIVST kits to be accessed through some stores and the internet but not in pharmacies.

Despite or because of this absence of regulation, RDT distribution continues through pharmacies, Internet sales, groceries and other businesses.

further development of current systems.

diagnostics using international and donor quality assurance processes that inform procurement decisions and harmonizing “minimum standards” of self-test devices.

|                                   |                                                                 |                                                                                                                                                                                                                                           |                                                                                                                                                                                                                                                                                                                                                                    |                                                                                                                                                                                                                                                                                                                          |                                                                                                                                                                                                                                                                                                                            |                                                                                                                                                                                                                                                                                                |                                                                                                                                                                                                                                                                                                                                                                                                                                                                                                                     |                                                                                                                                                                                                                                                                                                                                                                                                                          |                |                                                                                                                               |                                                                                                                                                                                                                                                                                                                                                                                |                                                                                                                                                                                                                                                                                                                                                                                                                                                                                                                                   |
|-----------------------------------|-----------------------------------------------------------------|-------------------------------------------------------------------------------------------------------------------------------------------------------------------------------------------------------------------------------------------|--------------------------------------------------------------------------------------------------------------------------------------------------------------------------------------------------------------------------------------------------------------------------------------------------------------------------------------------------------------------|--------------------------------------------------------------------------------------------------------------------------------------------------------------------------------------------------------------------------------------------------------------------------------------------------------------------------|----------------------------------------------------------------------------------------------------------------------------------------------------------------------------------------------------------------------------------------------------------------------------------------------------------------------------|------------------------------------------------------------------------------------------------------------------------------------------------------------------------------------------------------------------------------------------------------------------------------------------------|---------------------------------------------------------------------------------------------------------------------------------------------------------------------------------------------------------------------------------------------------------------------------------------------------------------------------------------------------------------------------------------------------------------------------------------------------------------------------------------------------------------------|--------------------------------------------------------------------------------------------------------------------------------------------------------------------------------------------------------------------------------------------------------------------------------------------------------------------------------------------------------------------------------------------------------------------------|----------------|-------------------------------------------------------------------------------------------------------------------------------|--------------------------------------------------------------------------------------------------------------------------------------------------------------------------------------------------------------------------------------------------------------------------------------------------------------------------------------------------------------------------------|-----------------------------------------------------------------------------------------------------------------------------------------------------------------------------------------------------------------------------------------------------------------------------------------------------------------------------------------------------------------------------------------------------------------------------------------------------------------------------------------------------------------------------------|
| Rugera et al <sup>43</sup> (2014) | Definitions for MDs and IVDs were same as the GHTF definitions. | In line with the GHTF A-D risk based classification system. The risk of causing harm is related to the performance of the device and likelihood of a malfunction and also the consequences of obtaining an incorrect test result for IVDs | Four Member States, Burundi, Kenya, Rwanda and Tanzania (Mainland and Zanzibar) reported legislation in the form of Acts of Parliament addressing audit visits to health, including medical diagnostics and medical devices. Uganda did not have specific legislation for medical devices/diagnostics but legislation for drugs could be expanded to include other | With the exception of Tzn, premarket regulation of medical devices and IVDs by National Regulatory Authorities is largely absent across the EAC. No audit visits to manufacturing sites are undertaken. Donated products supplied through vertical disease programs may receive some scrutiny, while others are approved | Most countries required manufacturers to have a local agent with legal accreditation prior to registering a product for distribution in the country. Import authorizations were required in Tzn and Ugn with some enforcement by warehouse inspections. Advertising controls were reported in Burundi, Tanzania and Uganda | Post market regulation was reported as being reactive rather than proactive i.e investigations were undertaken if problems were reported. The Private Health Laboratories Board in Tanzania was the only organization that reported a mechanism for tracking medical devices or guidelines for | Limited capacity for regulation of medical devices or IVDs. Where medical devices are controlled it is largely within disease specific programmes such as tuberculosis, malaria or HIV/AIDS with the Department of Health or international donors guiding procurement decisions rather than guidance from a national regulatory authority. Government bodies will often have a list of approved products to guide procurement. Capacity refers to either lab based technical experience to regulate the use of MDs, | Some countries reported dual responsibility for diagnostic devices where more than one agency is mandated, and some tensions were evident between laboratory-based organizations who evaluate diagnostic test performance and agencies whose primary activities lie in the regulation of medicines. e.g policies are under review to better define the roles Kenya Medical Laboratory Technicians and Technologist Board | No information | NRAs of the 5 States, Kenya Medical Laboratory Technicians and Technologist Board, Allied Health Professionals Council Uganda | The need to strengthen existing National Regulatory Authorities was also highlighted. Suggestions for future harmonization activities included use of a common nomenclature and definitions, mutual recognition between EAC countries and reducing the number of clinical trials required for registration. Areas to improve training and capacity included dossier evaluation | Mainly through harmonization efforts. Priority to be given to rapid diagnostics for important infectious diseases (HIV, TB, Malaria) across Partner states with extension to other MDs in the longer term. To this end, all members need to have a policy and legal framework for regulation. Also establishment of a communications platform to share information about safety of MDs promptly. Donor funding to enhance capacity and training of NRA recognising expertise in clinical trials or review of submission dossiers. |
|-----------------------------------|-----------------------------------------------------------------|-------------------------------------------------------------------------------------------------------------------------------------------------------------------------------------------------------------------------------------------|--------------------------------------------------------------------------------------------------------------------------------------------------------------------------------------------------------------------------------------------------------------------------------------------------------------------------------------------------------------------|--------------------------------------------------------------------------------------------------------------------------------------------------------------------------------------------------------------------------------------------------------------------------------------------------------------------------|----------------------------------------------------------------------------------------------------------------------------------------------------------------------------------------------------------------------------------------------------------------------------------------------------------------------------|------------------------------------------------------------------------------------------------------------------------------------------------------------------------------------------------------------------------------------------------------------------------------------------------|---------------------------------------------------------------------------------------------------------------------------------------------------------------------------------------------------------------------------------------------------------------------------------------------------------------------------------------------------------------------------------------------------------------------------------------------------------------------------------------------------------------------|--------------------------------------------------------------------------------------------------------------------------------------------------------------------------------------------------------------------------------------------------------------------------------------------------------------------------------------------------------------------------------------------------------------------------|----------------|-------------------------------------------------------------------------------------------------------------------------------|--------------------------------------------------------------------------------------------------------------------------------------------------------------------------------------------------------------------------------------------------------------------------------------------------------------------------------------------------------------------------------|-----------------------------------------------------------------------------------------------------------------------------------------------------------------------------------------------------------------------------------------------------------------------------------------------------------------------------------------------------------------------------------------------------------------------------------------------------------------------------------------------------------------------------------|

|                     |                                                                                                                                                                                                             |                                              |                                                                                                                                     |                                                                                                                                                                                                                                                                           |                                                                                                                                                  |                                                                                                                                                 |
|---------------------|-------------------------------------------------------------------------------------------------------------------------------------------------------------------------------------------------------------|----------------------------------------------|-------------------------------------------------------------------------------------------------------------------------------------|---------------------------------------------------------------------------------------------------------------------------------------------------------------------------------------------------------------------------------------------------------------------------|--------------------------------------------------------------------------------------------------------------------------------------------------|-------------------------------------------------------------------------------------------------------------------------------------------------|
| medicinal products. | without further testing. In few cases, local labs evaluate products. Products with international regulatory approval (Canada, Japan, Aus, USFDA or WHO pre-qual) can be approved using an abridged process. | with some vetting and pre approval required. | recalling substandard medical devices or IVDs. Most states had some mechanism in place for pharmaceuticals but not medical devices. | capacity to do lab assessment of IVDs or involvement in clinical trials to assess performance of MDS. Some capacity for clinical trials were reported for MDs used in vertical dx programs. Kenya and Uganda reported having accredited labs with Tzn working towards it. | (KMLTTB) which has responsibility for the quality of medical laboratory activities and the Pharmacy and Poisons Board which regulates medicines. | and review, development of protocols and Standard Operating Procedures, quality management systems and post market monitoring and surveillance. |
|---------------------|-------------------------------------------------------------------------------------------------------------------------------------------------------------------------------------------------------------|----------------------------------------------|-------------------------------------------------------------------------------------------------------------------------------------|---------------------------------------------------------------------------------------------------------------------------------------------------------------------------------------------------------------------------------------------------------------------------|--------------------------------------------------------------------------------------------------------------------------------------------------|-------------------------------------------------------------------------------------------------------------------------------------------------|



|                             |                                                                                                                                                                                                                                                                                                     |                                                                                                                                                                                                                                                     |                 |                                                                                                                                                                                                                                                                                                            |                                                                                                                                                                                                                                                                                                            |                                                                                                                                                                                                                                                                                                                     |                                                                                                                                                                                                                                                                                                                                                                                                                                                                    |                                                                                                                                                                                                                                                                                                                                                                  |                |                                                                                                                                                                                                                                                                               |
|-----------------------------|-----------------------------------------------------------------------------------------------------------------------------------------------------------------------------------------------------------------------------------------------------------------------------------------------------|-----------------------------------------------------------------------------------------------------------------------------------------------------------------------------------------------------------------------------------------------------|-----------------|------------------------------------------------------------------------------------------------------------------------------------------------------------------------------------------------------------------------------------------------------------------------------------------------------------|------------------------------------------------------------------------------------------------------------------------------------------------------------------------------------------------------------------------------------------------------------------------------------------------------------|---------------------------------------------------------------------------------------------------------------------------------------------------------------------------------------------------------------------------------------------------------------------------------------------------------------------|--------------------------------------------------------------------------------------------------------------------------------------------------------------------------------------------------------------------------------------------------------------------------------------------------------------------------------------------------------------------------------------------------------------------------------------------------------------------|------------------------------------------------------------------------------------------------------------------------------------------------------------------------------------------------------------------------------------------------------------------------------------------------------------------------------------------------------------------|----------------|-------------------------------------------------------------------------------------------------------------------------------------------------------------------------------------------------------------------------------------------------------------------------------|
| WHO <sup>44</sup><br>(2020) | WHO definition of MDs includes all activities by the manufacturer to ensure that medical devices continue to be safe and well performing, and actions are undertaken if the risk of continued use outweighs the benefits. Receiving and evaluating feedback are the minimum requirements of the PMS | All medical devices, including IVDs, are covered by this guidance, without prejudice to national or regional legislation. However, national or regional legislation can require the manufacturer to perform more elaborate post-market surveillance | No information. | Feedback from manufacturers: perform monitoring by collecting and analysing experience from actual use of medical devices. PMS may be reactive through passive collection and evaluation of feedback or proactive. PMS is linked to the overall risk management process of the manufacturer. Manufacturers | NRA raise awareness among users, should develop a system to receive feedback directly and ensure feedback is forwarded to manufacturers. NRAs may conduct a risk assessment when forwarding feedback to ensure MD is registered/authorized or regulatory action is required for unregistered/non-compliant | Although users have no official responsibility for post-market surveillance, most of the information on the experience with the actual use of medical devices will come from users. Users include; lay users/care givers, patients/clients including self-testers. Users detect/observe issues and provide feedback | What manufacturers/vendors report to NRAs will depend on national legislation. Overall patient/user harm is considered. In general, incidents that involved a serious public health threat, result in death of a user, patient/client or other person; serious deterioration or indirect harm, such as misdiagnosis, delayed diagnosis, delayed or inappropriate treatment, etc. The timing of reporting will also depend on severity of the threat. Manufacturers | Receiving and acting upon user or other feedback is the most basic form of post-market surveillance that must always be performed by the manufacturer, irrespective of their resources. This means that the methods to submit feedback shall be readily available and provide as few barriers as possible to users and patients/clients to provide the feedback. | No information | Manufacturers of medical devices, and their economic operators in the medical device supply chain; health care providers and their patients/clients as users of medical devices; programme implementers, including procurement agencies and central medical stores; and NRAs. |
|-----------------------------|-----------------------------------------------------------------------------------------------------------------------------------------------------------------------------------------------------------------------------------------------------------------------------------------------------|-----------------------------------------------------------------------------------------------------------------------------------------------------------------------------------------------------------------------------------------------------|-----------------|------------------------------------------------------------------------------------------------------------------------------------------------------------------------------------------------------------------------------------------------------------------------------------------------------------|------------------------------------------------------------------------------------------------------------------------------------------------------------------------------------------------------------------------------------------------------------------------------------------------------------|---------------------------------------------------------------------------------------------------------------------------------------------------------------------------------------------------------------------------------------------------------------------------------------------------------------------|--------------------------------------------------------------------------------------------------------------------------------------------------------------------------------------------------------------------------------------------------------------------------------------------------------------------------------------------------------------------------------------------------------------------------------------------------------------------|------------------------------------------------------------------------------------------------------------------------------------------------------------------------------------------------------------------------------------------------------------------------------------------------------------------------------------------------------------------|----------------|-------------------------------------------------------------------------------------------------------------------------------------------------------------------------------------------------------------------------------------------------------------------------------|

system. MS or vigilance refers to all activities of NRAs in the oversight of medical devices on the market, to ensure that the safety, quality and performance continues to be adequate.

urers collect and classify feedback and determine reportability to NRA. Next they determine if corrective actions are needed and implement these/other preventive actions.

devices. Due to limited resources (financial and human) a MS plan will be prioritized using a risk-based approach for closer surveillance including testing of MDs.

to manufacture and NRA if possible. Manufacturers may provide advice on further actions to take. Registries are being increasingly used, especially for implantable medical devices, to collect data on clinical use and to assess use in the medical device's target population.

should inform affected users of any corrective actions taken in the field.

|                                                |                                                                                                                                                                                                                                                                                                                                     |                                                                                                                                                                                                                                                                                                                                                                                         |                |                                                                                                                                                                                                                                                                                                                                  |                                                                                                                                                                                                                                                                                                            |                                                                                                                                                                                                                                                                                                                                 |                                                                                                                                                                                                                                                                                           |                                                                                                                                                                                                                                                                                                                                                                                                                            |                |                                                                                                                            |                                                                                                                                                                                                                                                                                                                                                                   |                                                                                                                                                                                                                                                                                                                                                                                                                                                                |
|------------------------------------------------|-------------------------------------------------------------------------------------------------------------------------------------------------------------------------------------------------------------------------------------------------------------------------------------------------------------------------------------|-----------------------------------------------------------------------------------------------------------------------------------------------------------------------------------------------------------------------------------------------------------------------------------------------------------------------------------------------------------------------------------------|----------------|----------------------------------------------------------------------------------------------------------------------------------------------------------------------------------------------------------------------------------------------------------------------------------------------------------------------------------|------------------------------------------------------------------------------------------------------------------------------------------------------------------------------------------------------------------------------------------------------------------------------------------------------------|---------------------------------------------------------------------------------------------------------------------------------------------------------------------------------------------------------------------------------------------------------------------------------------------------------------------------------|-------------------------------------------------------------------------------------------------------------------------------------------------------------------------------------------------------------------------------------------------------------------------------------------|----------------------------------------------------------------------------------------------------------------------------------------------------------------------------------------------------------------------------------------------------------------------------------------------------------------------------------------------------------------------------------------------------------------------------|----------------|----------------------------------------------------------------------------------------------------------------------------|-------------------------------------------------------------------------------------------------------------------------------------------------------------------------------------------------------------------------------------------------------------------------------------------------------------------------------------------------------------------|----------------------------------------------------------------------------------------------------------------------------------------------------------------------------------------------------------------------------------------------------------------------------------------------------------------------------------------------------------------------------------------------------------------------------------------------------------------|
| World Health Organization <sup>45</sup> (2003) | The Global Harmonization Task Force harmonized definition: “Medical device” means any instrument, apparatus, implement, machine, appliance, implant, in vitro reagent or calibrator, software, material or other similar or related article, intended by the manufacturer to be used, alone or in combination, for human beings for | Classification is based on risk assessment to categorize medical devices according to their perceived potential hazards. Potential areas of hazard considered include: the degree of invasiveness, duration of contact, body system affected and local vs systemic effects. The GHTF is proposing a harmonized classification system based on similar systems in the EU, US and Canada. | not applicable | Manufacturer to control/monitor product. Activities regulated include device attributes (safety, performance), quality systems and labelling to ensure accurate representation. All systems use the risk management philosophy with the degree of regulatory scrutiny increasing with the potential risks of the medical device. | Vendor establishment and registration including listing of products available or in use, fulfilment of after-sale obligations (post-marketing surveillance) and appropriate advertising. Vendor information facilitates governments in tracking medical devices. A priority for local regulatory oversight | Surveillance/vigilance. Vendors have after sale obligations - monitor device performance, identify problems and alert. Some countries have mandatory requirements for vendors or manufacturers to report all device-related events that have resulted, or could result, in serious injury or death. Developing countries should | Quality management standards for medical devices are issued by the International Organization of Standards. The applicable standard is determined by the risk class of the device and depends upon the regulatory system of the country or region. Most countries will use IOS standards. | Government role in ensuring medical device safety and performance is through the implementation of regulation. 3 stages of regulatory control are described which correspond across the life span of a medical device. These are the pre-market and post market controls, and the placing-on-market controls, the last which is not an official term but related to the important aspect of how the product is represented | No information | WHO, Manufacturers, Vendors; Users including healthcare providers; Public which include direct users, National government. | Problems have risen with refurbished and donated MDs and equipment-often traded or donated to developing countries with questions around the quality, availability of after-sale technical support or spare parts. Not much work done for refurbished devices but WHO has worked to set out guidelines for dealing with donated devices and equipment. Currently, | Efforts by the GHTF and trends towards use of international standards and the recognition of international certification, creates opportunities for countries to establish low-cost programmes that promote the safety and performance of medical devices by taking full advantage of what others have already done in this field. Local adoption of harmonized recommendations will facilitate international exports of medical devices manufactured locally. |
|------------------------------------------------|-------------------------------------------------------------------------------------------------------------------------------------------------------------------------------------------------------------------------------------------------------------------------------------------------------------------------------------|-----------------------------------------------------------------------------------------------------------------------------------------------------------------------------------------------------------------------------------------------------------------------------------------------------------------------------------------------------------------------------------------|----------------|----------------------------------------------------------------------------------------------------------------------------------------------------------------------------------------------------------------------------------------------------------------------------------------------------------------------------------|------------------------------------------------------------------------------------------------------------------------------------------------------------------------------------------------------------------------------------------------------------------------------------------------------------|---------------------------------------------------------------------------------------------------------------------------------------------------------------------------------------------------------------------------------------------------------------------------------------------------------------------------------|-------------------------------------------------------------------------------------------------------------------------------------------------------------------------------------------------------------------------------------------------------------------------------------------|----------------------------------------------------------------------------------------------------------------------------------------------------------------------------------------------------------------------------------------------------------------------------------------------------------------------------------------------------------------------------------------------------------------------------|----------------|----------------------------------------------------------------------------------------------------------------------------|-------------------------------------------------------------------------------------------------------------------------------------------------------------------------------------------------------------------------------------------------------------------------------------------------------------------------------------------------------------------|----------------------------------------------------------------------------------------------------------------------------------------------------------------------------------------------------------------------------------------------------------------------------------------------------------------------------------------------------------------------------------------------------------------------------------------------------------------|

one or more specific purposes and which does not achieve its primary intended action in or on the human body by pharmacological, immunological or metabolic means, but which may be assisted in its function by such means.

Authorities should be prioritise the user acknowledge the establishment of training and post-market surveillance of devices (correct use, problem alerts and recalls). International sharing of information on alert systems for medical devices is essential for more effective risk management.

Government should be able to carry out pre-market review, either for imported devices or those manufactured locally, could assure regulatory compliance by taking advantage of the work of major device manufacturing countries.

to the user. Pre-market controls contribute to controlling the product to ensure safety and performance at the manufacturer stage. Post market controls ensure continued safety and performance in use.

WHO export certificates only apply to pharmaceutical products. Regulatory authorities may not have the resources available to provide details specifications on devices for regulation.

|                             |                                                                                                                                                                                                                                                                                                                 |                                                                                                                                                                                                                                                                                                                                                                                                                                                         |                                                                                                                                                                                                                                                                                                                                                                                       |                                                                                                                                                                                                                                                                                                   |                                                                                                                                                                                                                                                                                                                 |                                                                                                                                                                                                                                                                                                                        |                                                                                                                                                                                   |                                                                                                                                                                                                                                                                                                                                                                                                       |                                                                                                                                                                                                                                        |      |
|-----------------------------|-----------------------------------------------------------------------------------------------------------------------------------------------------------------------------------------------------------------------------------------------------------------------------------------------------------------|---------------------------------------------------------------------------------------------------------------------------------------------------------------------------------------------------------------------------------------------------------------------------------------------------------------------------------------------------------------------------------------------------------------------------------------------------------|---------------------------------------------------------------------------------------------------------------------------------------------------------------------------------------------------------------------------------------------------------------------------------------------------------------------------------------------------------------------------------------|---------------------------------------------------------------------------------------------------------------------------------------------------------------------------------------------------------------------------------------------------------------------------------------------------|-----------------------------------------------------------------------------------------------------------------------------------------------------------------------------------------------------------------------------------------------------------------------------------------------------------------|------------------------------------------------------------------------------------------------------------------------------------------------------------------------------------------------------------------------------------------------------------------------------------------------------------------------|-----------------------------------------------------------------------------------------------------------------------------------------------------------------------------------|-------------------------------------------------------------------------------------------------------------------------------------------------------------------------------------------------------------------------------------------------------------------------------------------------------------------------------------------------------------------------------------------------------|----------------------------------------------------------------------------------------------------------------------------------------------------------------------------------------------------------------------------------------|------|
| WHO <sup>46</sup><br>(2017) | Same as WHO definition (2003). However, not all products will fit into this definition of medical devices comfortably. These are referred to as products for which it is unclear which legislation applies. A combination product is a product comprising two or more components which are regulated as medical | Generally, the risk of a medical device is determined by the potential of the device to cause harm to the patient/user. For IVDs, risk class is primarily determined by the impact of an incorrect result either on the health of an individual or the public. Classification system guides the regulatory controls to be implemented. Classes are broadly from A to D: A, low risk B low-med risk, C med-high risk and D high risk. Regulatory control | Medical device regulation must have a sound basis in law. The document recommends a phased implementation of regulatory control systems. The basic level is the publication of a law establishing a NRA and providing resources to it. Expanded levels includes inspection of regulatory establishments and oversight of clinical investigations. More broadly, regulation of medical | Manufacturers demonstrate compliance with GHTF guidance in the technical documentation shown to NRAs before or after introduction of medical devices to market. Some NRAs may appoint an external body for conformity assessment to assist in this function of pre-market approval. The manufactu | These include registration of establishments, listing of devices and import controls. The minimum requirements for registration should be that the authorized representative provides the regulatory authority with information on its place of business, the name and position of a responsible person and the | At the basic level the regulatory authority should establish a system whereby patients and the manufacturer of medical devices, either directly or through the authorized representative, can report complaints involving medical devices, including malfunction at the device level and adverse events at the patient | It is recommended that regardless of class, manufacturers should be ready to submit technical documentation where it is required to assure conformity to regulatory requirements. | International harmonization guidance documents (by the GHTF) have been developed for almost all basic and expanded pre-market controls. Controls for medical devices may be implemented through reliance or recognition. In addition to relying upon other authorities, for some medical devices (mostly IVDs), the regulatory authority may choose to rely upon evaluations conducted by the WHO PQT | To safeguard public health, medical devices imported as donations should comply with all regulatory requirements on safety, quality and performance and should not differ from those that are imported through a regular supply chain. | NRAs |
|-----------------------------|-----------------------------------------------------------------------------------------------------------------------------------------------------------------------------------------------------------------------------------------------------------------------------------------------------------------|---------------------------------------------------------------------------------------------------------------------------------------------------------------------------------------------------------------------------------------------------------------------------------------------------------------------------------------------------------------------------------------------------------------------------------------------------------|---------------------------------------------------------------------------------------------------------------------------------------------------------------------------------------------------------------------------------------------------------------------------------------------------------------------------------------------------------------------------------------|---------------------------------------------------------------------------------------------------------------------------------------------------------------------------------------------------------------------------------------------------------------------------------------------------|-----------------------------------------------------------------------------------------------------------------------------------------------------------------------------------------------------------------------------------------------------------------------------------------------------------------|------------------------------------------------------------------------------------------------------------------------------------------------------------------------------------------------------------------------------------------------------------------------------------------------------------------------|-----------------------------------------------------------------------------------------------------------------------------------------------------------------------------------|-------------------------------------------------------------------------------------------------------------------------------------------------------------------------------------------------------------------------------------------------------------------------------------------------------------------------------------------------------------------------------------------------------|----------------------------------------------------------------------------------------------------------------------------------------------------------------------------------------------------------------------------------------|------|

products, i.e. medicine/device, or vaccine/medical device. A lack of clarity in such cases may lead to overlapping or conflicting regulatory requirements for a product, or no regulation at all.

increases with class of device. The manufacturer has the primary responsibility to classify the MD but the decision may be challenged by the local NRA.

devices should be coordinated with that of other medical products e.g. medicines and vaccines, and with wider government policy objectives.

regulatory demonstration of conformity through its quality management system. Class A devices require no submission of dossiers or documents for pre-market approval except where sterility or accuracy of a measuring function is required. Class B devices do not normally require pre-market review but this may be

manufacturers represent those adverse events resulting in death or serious injury. Vigilance reports may trigger investigation, trend analysis and/or possible field safety corrective actions or enforcement.

level, in particular those events resulting in death or serious injury. Vigilance reports may trigger investigation, trend analysis and/or possible field safety corrective actions or enforcement.

for IVDs. The focus of this programme is on IVDs for priority diseases such as HIV/AIDS, malaria, hepatitis C and others, and their suitability for use in resource-limited settings

requested  
to verify  
compliance. Class C  
and D  
devices  
require an  
in depth  
review of  
technical  
documentation prior  
to  
approval  
and either  
the  
authority  
has  
confidence  
the QMS  
system is  
appropriate or  
conducts  
an audit  
before  
market  
authorization is given.

|                             |                                                                                                                                                                                                                             |                            |                                   |                                                                                                                                                                                                                                                                                                                             |                                                                                                                                                                                                                                                                                                                         |                                                                                                                                                                                                                                                                                                                                                                             |                                                                                                                                                                                                                                                                                                                                                                                               |                |                                                                                                                                                                                                                                                     |
|-----------------------------|-----------------------------------------------------------------------------------------------------------------------------------------------------------------------------------------------------------------------------|----------------------------|-----------------------------------|-----------------------------------------------------------------------------------------------------------------------------------------------------------------------------------------------------------------------------------------------------------------------------------------------------------------------------|-------------------------------------------------------------------------------------------------------------------------------------------------------------------------------------------------------------------------------------------------------------------------------------------------------------------------|-----------------------------------------------------------------------------------------------------------------------------------------------------------------------------------------------------------------------------------------------------------------------------------------------------------------------------------------------------------------------------|-----------------------------------------------------------------------------------------------------------------------------------------------------------------------------------------------------------------------------------------------------------------------------------------------------------------------------------------------------------------------------------------------|----------------|-----------------------------------------------------------------------------------------------------------------------------------------------------------------------------------------------------------------------------------------------------|
| WHO <sup>47</sup><br>(2016) | A medical device is any device or machine, tool or application for medical use, whether alone or with any other supplements such as those required for special applications are running, which are developed for human use. | Group I, IIA, IIB, and III | Medical Device Regulations (2010) | Yes - Depending on the risk class of the device, the conformity assessment procedure varies. (E.g., A Class I non-sterile, non-measuring device requires a declaration of conformity before it may be placed on the market.). Egypt relies on the highest health authority in US and EU jurisdiction to issue a certificate | The manufacturer must collect data in one of two situations: (1) as a condition of product approval, and (2) to re-affirm product safety when post-market adverse incident reports suggest that pre-market safety claims are inconsistent with actual use and result in unacceptable risk. Guideline for Medical Device | Adverse event reporting: The manufacturer must: - have suitable vigilance systems in place, - Notify the Medical Device Safety Department (MDS), - investigate and assess incidents, - submit a trend report to the MDS when reporting criteria are met as well as a periodic summary report. Users are also encouraged to report suspected incidents to the manufacturers. | Guidelines on a Medical Device Vigilance System, Art. pg. 27. Field safety corrective action monitoring: Manufacturers must notify the MDS of any Field safety corrective actions (FSCA) of their products, take all necessary corrective actions, issue a field safety notice, and distribute that notice to organizations and users. Guidelines on a Medical Device Vigilance System, pg. 7 | No information | Medical Device Department, Egyptian Drug Authority. The Medical Device Safety Department (MDS), within the Central Administration of Pharmaceutical Affairs (CAPA), is a separate entity slated with monitoring the medical device market in Egypt. |
|-----------------------------|-----------------------------------------------------------------------------------------------------------------------------------------------------------------------------------------------------------------------------|----------------------------|-----------------------------------|-----------------------------------------------------------------------------------------------------------------------------------------------------------------------------------------------------------------------------------------------------------------------------------------------------------------------------|-------------------------------------------------------------------------------------------------------------------------------------------------------------------------------------------------------------------------------------------------------------------------------------------------------------------------|-----------------------------------------------------------------------------------------------------------------------------------------------------------------------------------------------------------------------------------------------------------------------------------------------------------------------------------------------------------------------------|-----------------------------------------------------------------------------------------------------------------------------------------------------------------------------------------------------------------------------------------------------------------------------------------------------------------------------------------------------------------------------------------------|----------------|-----------------------------------------------------------------------------------------------------------------------------------------------------------------------------------------------------------------------------------------------------|



of free  
circulation.  
This Free  
Sale  
Certificate  
is  
necessary  
for any  
product  
entering  
into the  
market.

Vigilance  
System,  
pg. 5. The  
departmen  
t of  
medical  
device  
inspection  
conducts  
the  
inspection  
on local  
manufactu  
rers aiming  
to ensure  
that they  
apply GMP  
regulations  
: Initial  
Periodic  
(routine  
inspection)  
. In  
addition,  
the  
departmen  
t inspects  
stores of  
imported  
medical  
devices.

|                             |                                                                                                                                                                                                                                                                                                                                |                                                                                                                                                                                                                                            |                                                                                                                                                                         |                                                                                                                                              |                                                                                                                                                                                                                                                                                                                              |                                                                                                                                                                                                                                                                                                                  |                                                                                                                                                                                                                                                                                                                                                                                                                                                                                                       |                                                                                                                                                                                            |    |     |
|-----------------------------|--------------------------------------------------------------------------------------------------------------------------------------------------------------------------------------------------------------------------------------------------------------------------------------------------------------------------------|--------------------------------------------------------------------------------------------------------------------------------------------------------------------------------------------------------------------------------------------|-------------------------------------------------------------------------------------------------------------------------------------------------------------------------|----------------------------------------------------------------------------------------------------------------------------------------------|------------------------------------------------------------------------------------------------------------------------------------------------------------------------------------------------------------------------------------------------------------------------------------------------------------------------------|------------------------------------------------------------------------------------------------------------------------------------------------------------------------------------------------------------------------------------------------------------------------------------------------------------------|-------------------------------------------------------------------------------------------------------------------------------------------------------------------------------------------------------------------------------------------------------------------------------------------------------------------------------------------------------------------------------------------------------------------------------------------------------------------------------------------------------|--------------------------------------------------------------------------------------------------------------------------------------------------------------------------------------------|----|-----|
| WHO <sup>48</sup><br>(2016) | Similar to FDA definition: A medical device refers to an instrument, apparatus, implement, medical equipment, machine, contrivance, implant, in vitro reagent, or other similar or related article, including any component, part or accessory, that is: a) recognized in a pharmacopoeia or any supplement to it; b) intended | Class I, II, III, and IV. Classification depends on the indications for use, duration of use, degree of invasiveness, and local vs. systemic effect of the device. Classification rules are detailed in Annex II of Guideline (Sept. 2014) | A Proclamation to Provide for Food, Medicine and Health Care Administration and Control, Proclamation No. 661/2009 with Guidelines for Registration of Medical Devices. | Medical device essential safety and performance requirements are listed for MDs and IVDs but no other details of pre-market evaluation given | No import controls. Registration of establishment: An agency agreement should be made between the manufacturer of the device for registration and the agent responsible for the import, distribution, and sale of the product in Ethiopia. Guideline (Sept. 2014), Section I, Art. 2 Listing of medical devices: All medical | Prior to and after placing the product on the market, the manufacturer should put a process in place, as part of its quality management system, to assess the continued conformity of the device to the essential principles of safety and performance through the post-marketing phase. Guideline (Sept. 2014), | Inspection (QMS): The manufacturer should always provide certification of conformity against internationally recognized standards for all class devices. The adequacy of the standards in relation to safety and performance of the device should be discussed with relevant supporting data for Class II and higher devices. In case the provided certification is found to be unsatisfactory, the Authority may conduct an onsite audit and inspection of the facilities of Class III and IV device | Adverse event reporting: Both the manufacturer and the NRA must sign an agreement that they are both responsible for post-marketing reporting of the device. Guideline (Sept. 2014), p. 26 | No | NRA |
|-----------------------------|--------------------------------------------------------------------------------------------------------------------------------------------------------------------------------------------------------------------------------------------------------------------------------------------------------------------------------|--------------------------------------------------------------------------------------------------------------------------------------------------------------------------------------------------------------------------------------------|-------------------------------------------------------------------------------------------------------------------------------------------------------------------------|----------------------------------------------------------------------------------------------------------------------------------------------|------------------------------------------------------------------------------------------------------------------------------------------------------------------------------------------------------------------------------------------------------------------------------------------------------------------------------|------------------------------------------------------------------------------------------------------------------------------------------------------------------------------------------------------------------------------------------------------------------------------------------------------------------|-------------------------------------------------------------------------------------------------------------------------------------------------------------------------------------------------------------------------------------------------------------------------------------------------------------------------------------------------------------------------------------------------------------------------------------------------------------------------------------------------------|--------------------------------------------------------------------------------------------------------------------------------------------------------------------------------------------|----|-----|

|                                                                                                                                                                                                                                                                                                                                   |                                                                                                                                                                                                                                                                                                                           |                             |                                                                                                                                                                                                            |
|-----------------------------------------------------------------------------------------------------------------------------------------------------------------------------------------------------------------------------------------------------------------------------------------------------------------------------------|---------------------------------------------------------------------------------------------------------------------------------------------------------------------------------------------------------------------------------------------------------------------------------------------------------------------------|-----------------------------|------------------------------------------------------------------------------------------------------------------------------------------------------------------------------------------------------------|
| <p>for use in the diagnosis of disease or other conditions, or in the cure, mitigation, treatment, or prevention of disease, in man or other animals,, or; c) intended to affect the structure or any function of the body of a human being or other animal and which does not achieve any of its principal intended purposes</p> | <p>devices should be registered with FMHACA. Guideline (Sept. 2014). Labelling: Labels may appear on the device, on packaging, or as instructions for use. They must: - be in English and/or Amharic - not be presented in a false, misleading , or deceptive way - be appropriately formatted etc. Guidelines (Sept.</p> | <p>Section II, Art. 2.2</p> | <p>manufacturers. Unless it is deemed to be necessary, the QMS of Class I medical device manufacturers' facilities are normally not subjected to onsite inspection. Guideline (Sept. 2014), p. 40, 50.</p> |
|-----------------------------------------------------------------------------------------------------------------------------------------------------------------------------------------------------------------------------------------------------------------------------------------------------------------------------------|---------------------------------------------------------------------------------------------------------------------------------------------------------------------------------------------------------------------------------------------------------------------------------------------------------------------------|-----------------------------|------------------------------------------------------------------------------------------------------------------------------------------------------------------------------------------------------------|

through  
chemical  
action  
within the  
body of  
the human  
being or  
other  
animals  
and is not  
dependent  
s upon  
being  
metabolize  
d for the  
achieveme  
nt of any  
of its  
principal  
intended  
purposes.

2014), p.  
34-38

|                             |                                          |                              |                                                                                                                                                                                                                                                                                                                                 |                                                                                                                                                                                                                                                                                                                                                                                                                         |                                                                                                                                                                                                                                                                                                                                                                                                                                                |                                                                                                                                                                                                                                                                                                                                                                                                                         |                                                                                                                                                                                                                                                                                                                                                                                                                                                                                                                                                                                   |                   |                                                                                                   |
|-----------------------------|------------------------------------------|------------------------------|---------------------------------------------------------------------------------------------------------------------------------------------------------------------------------------------------------------------------------------------------------------------------------------------------------------------------------|-------------------------------------------------------------------------------------------------------------------------------------------------------------------------------------------------------------------------------------------------------------------------------------------------------------------------------------------------------------------------------------------------------------------------|------------------------------------------------------------------------------------------------------------------------------------------------------------------------------------------------------------------------------------------------------------------------------------------------------------------------------------------------------------------------------------------------------------------------------------------------|-------------------------------------------------------------------------------------------------------------------------------------------------------------------------------------------------------------------------------------------------------------------------------------------------------------------------------------------------------------------------------------------------------------------------|-----------------------------------------------------------------------------------------------------------------------------------------------------------------------------------------------------------------------------------------------------------------------------------------------------------------------------------------------------------------------------------------------------------------------------------------------------------------------------------------------------------------------------------------------------------------------------------|-------------------|---------------------------------------------------------------------------------------------------|
| WHO <sup>49</sup><br>(2016) | similar to<br>FDA<br>definition<br>above | Class I, II, III,<br>and IV. | Food and<br>Drugs Act<br>(amended<br>1996), with<br>Guidelines<br>for<br>Importation<br>and<br>Registration<br>of Medical<br>devices. This<br>establishes<br>the Food<br>and Drug<br>Authority<br>with the<br>Medical<br>Device<br>Department<br>responsible<br>for<br>regulation<br>and<br>oversight of<br>medical<br>devices. | A<br>manufactu<br>rer must<br>submit an<br>application<br>prior to<br>import,<br>which<br>includes a<br>declaratio<br>n of<br>conformity<br>to the<br>Guideline<br>for<br>Registratio<br>n of<br>Medical<br>Device.<br>Medical<br>devices<br>can be<br>registered<br>provided<br>that they<br>comply<br>with the<br>prescribed<br>standards<br>and that<br>the<br>manufactu<br>ring<br>operations<br>for the<br>article | Import<br>controls:<br>All<br>imported<br>medical<br>devices<br>must be<br>registered<br>and<br>accompani<br>ed by a<br>certificate<br>of analysis<br>issued by<br>the<br>competent<br>regulatory<br>authority<br>of the<br>exporting<br>country.<br>The Food<br>and Drugs<br>Authority<br>issues a<br>license for<br>importers.<br>Advertising<br>: Deceptive<br>advertising<br>of a<br>medical<br>device is<br>prohibited.<br>One may<br>not | The<br>relevant<br>body must<br>appoint a<br>local<br>representa<br>tive, who<br>monitors<br>the safety<br>of a<br>product<br>after<br>marketing<br>approval.<br>Adverse<br>event<br>reporting:<br>An<br>appointed<br>local<br>representa<br>tive must<br>report<br>adverse<br>effects or<br>events to<br>the Food<br>and Drugs<br>Authority.<br>The<br>Authority<br>will<br>monitor<br>the safety<br>of the<br>medical | Registration of<br>establishment:<br>A person may<br>not<br>manufacture for<br>sale, sell, supply<br>or store medical<br>devices in<br>premises unless<br>registered.<br>Listing of<br>medical devices:<br>The Food and<br>Drugs Authority<br>must register<br>the medical<br>device if the<br>Authority is<br>satisfied that<br>the medical<br>device complies<br>with standards.<br>All devices that<br>are<br>manufactured,<br>prepared,<br>imported,<br>exported,<br>distributed,<br>sold, supplied,<br>or exhibited for<br>sale must be<br>registered with<br>the Authority. | No<br>information | NRA:<br>Medical<br>Devices<br>Departm<br>ent<br>(MDD),<br>Food and<br>Drugs<br>Authority<br>Ghana |
|-----------------------------|------------------------------------------|------------------------------|---------------------------------------------------------------------------------------------------------------------------------------------------------------------------------------------------------------------------------------------------------------------------------------------------------------------------------|-------------------------------------------------------------------------------------------------------------------------------------------------------------------------------------------------------------------------------------------------------------------------------------------------------------------------------------------------------------------------------------------------------------------------|------------------------------------------------------------------------------------------------------------------------------------------------------------------------------------------------------------------------------------------------------------------------------------------------------------------------------------------------------------------------------------------------------------------------------------------------|-------------------------------------------------------------------------------------------------------------------------------------------------------------------------------------------------------------------------------------------------------------------------------------------------------------------------------------------------------------------------------------------------------------------------|-----------------------------------------------------------------------------------------------------------------------------------------------------------------------------------------------------------------------------------------------------------------------------------------------------------------------------------------------------------------------------------------------------------------------------------------------------------------------------------------------------------------------------------------------------------------------------------|-------------------|---------------------------------------------------------------------------------------------------|

comply with the prescribed current code of good manufacturing practice. One may not conduct a clinical trial of a medical device without an approved, valid certificate issued by the Food and Drugs Authority. No reliance on other approvals were directly mentioned .

advertise a medical device without the prior approval of the Food and Drugs Authority. Deceptive labelling of a medical device is prohibited. The label of the medical device must be in English and include information on the name of the device, the name and address of the manufacturer, the identifier of the device, the

devices through analysis or report and take appropriate action when necessary. Field safety corrective action monitoring : The Food and Drugs Authority may order the closure of any premises where medical devices are manufactured, stored, prepared or sold if the Authority has reason to believe that the articles are at risk of

|                          |                        |               |                           |                                                                                                                                                                                   |                                                                                                                                                                                       |    |     |
|--------------------------|------------------------|---------------|---------------------------|-----------------------------------------------------------------------------------------------------------------------------------------------------------------------------------|---------------------------------------------------------------------------------------------------------------------------------------------------------------------------------------|----|-----|
|                          |                        |               |                           | batch number (for class III or IV) devices, etc.                                                                                                                                  | contamination or deterioration.                                                                                                                                                       |    |     |
| WHO <sup>50</sup> (2016) | same as WHO definition | not available | Yes and NRA is available. | Medical devices may not be imported, placed on the market, or put into use unless there is a certificate that shows their compliance with essential requirements on the health of | The failure to report adverse events may result in a fine and imprisonment based on Public Health Law, Art. 382. Manufacturers, users, and those familiar with any adverse event must | No | NRA |

patients.  
The  
ministry of  
health  
provides  
the  
certificate.  
The  
manufactu  
rer is  
responsibl  
e for  
meeting  
conformity  
requireme  
nts, as set  
by the  
Ministry of  
Health  
Public  
Health  
Law, Art.  
379.

report that  
event to  
the  
Ministry of  
Health.  
Public  
Health  
Law, Art.  
381.



|                             |                                                                                                                                                                                                                                                                                                                               |           |                                                                                                                                                                   |                                                                                                                                                                                                                                                                                                                                    |                                                                                                                                                                                                                                                                                                             |                                                                                                                                                                                                                |    |
|-----------------------------|-------------------------------------------------------------------------------------------------------------------------------------------------------------------------------------------------------------------------------------------------------------------------------------------------------------------------------|-----------|-------------------------------------------------------------------------------------------------------------------------------------------------------------------|------------------------------------------------------------------------------------------------------------------------------------------------------------------------------------------------------------------------------------------------------------------------------------------------------------------------------------|-------------------------------------------------------------------------------------------------------------------------------------------------------------------------------------------------------------------------------------------------------------------------------------------------------------|----------------------------------------------------------------------------------------------------------------------------------------------------------------------------------------------------------------|----|
| WHO <sup>51</sup><br>(2016) | A medical device means any instrument, apparatus or contrivance (including components, parts and accessories thereof) manufactured, sold or advertised for internal or external use in the diagnosis, treatment, mitigation or prevention of any disease, disorder, abnormal physical state or the symptom thereof, in man or | no detail | National Agency for Food and Drug Administration and Control Act Cap N1 Laws (2004), with Guidelines for the registration of imported medical devices in Nigeria. | All medical devices must be registered to be manufactured, imported, exported, advertised, sold or distributed in Nigeria. An application for registration must be made either by the Nigerian manufacturer or through an authorized representative for a manufacturer outside of Nigeria: Guidelines for Registration of Imported | Import controls: The Ports Inspection Directorate and controls the importation of medical devices. Advertising: The Registration and Regulatory Affairs Directorate implement advertising controls of regulated products, which include medical devices. Labelling: All labels must be clear and informativ | The Pharmacovigilance/Post Marketing Survey (PV-PMS) Directorate provides post marketing surveillance of NAFDAC regulated products, which include medical devices, and maintains a database on adverse events. | no |
|-----------------------------|-------------------------------------------------------------------------------------------------------------------------------------------------------------------------------------------------------------------------------------------------------------------------------------------------------------------------------|-----------|-------------------------------------------------------------------------------------------------------------------------------------------------------------------|------------------------------------------------------------------------------------------------------------------------------------------------------------------------------------------------------------------------------------------------------------------------------------------------------------------------------------|-------------------------------------------------------------------------------------------------------------------------------------------------------------------------------------------------------------------------------------------------------------------------------------------------------------|----------------------------------------------------------------------------------------------------------------------------------------------------------------------------------------------------------------|----|

animal.  
CAP N1  
Laws, Art.  
31

Medical  
Devices in  
Nigeria.  
  
e and  
include at  
minimum:  
- name of  
the  
product -  
name and  
address of  
the  
manufactu  
rer -  
NAFDAC  
registratio  
n number -  
batch  
number,  
manufactu  
ring date,  
and expiry  
date - net  
contents -  
directions  
for safe  
use. Any  
regulated  
product in  
a foreign  
language  
will not be  
considered  
for  
registratio  
n unless an  
English  
translation  
is included.

|                             |                   |               |                                                                                                                                                                                                                                                                                                                                                                               |                                                                                                                                                                 |                                                                                                                                                                                    |                                                                                                                                                                                                                                                                                                                   |    |                                                                    |
|-----------------------------|-------------------|---------------|-------------------------------------------------------------------------------------------------------------------------------------------------------------------------------------------------------------------------------------------------------------------------------------------------------------------------------------------------------------------------------|-----------------------------------------------------------------------------------------------------------------------------------------------------------------|------------------------------------------------------------------------------------------------------------------------------------------------------------------------------------|-------------------------------------------------------------------------------------------------------------------------------------------------------------------------------------------------------------------------------------------------------------------------------------------------------------------|----|--------------------------------------------------------------------|
| WHO <sup>52</sup><br>(2016) | none<br>available | not available | Medicines and Allied Control Act, Chapter 15. Of Medical devices is focused on only two types of devices, condoms and gloves, which are regulated in Zimbabwe with separate guidelines. Medical devices unit carries out quality control testing of condoms and gloves in line with international standards. Physical tests are carried out on the medical devices as well as | No person shall sell any condoms/gloves unless such is of a type and brand which has been approved by the Authority. A register of approved condoms and gloves. | Import controls: Port Authorities shall not approve the importation of gloves batches unless the NRA has approved such importation. No guidelines for advertisement and labelling. | Devices may be subject to inspection. Any person who resists, obstructs an inspector, customs officer or police officer in the exercise of his functions under this Act shall be guilty of an offence and liable to a fine or to imprisonment under Medicines and Allied Substances Control Act, Art. 67. Adverse | no | NRA: Medical Devices Unit, Medicines Control Authority of Zimbabwe |
|-----------------------------|-------------------|---------------|-------------------------------------------------------------------------------------------------------------------------------------------------------------------------------------------------------------------------------------------------------------------------------------------------------------------------------------------------------------------------------|-----------------------------------------------------------------------------------------------------------------------------------------------------------------|------------------------------------------------------------------------------------------------------------------------------------------------------------------------------------|-------------------------------------------------------------------------------------------------------------------------------------------------------------------------------------------------------------------------------------------------------------------------------------------------------------------|----|--------------------------------------------------------------------|

checks for  
poor  
workmanship  
p.

event  
related to  
medical  
devices  
can be  
reported  
to the  
MCAZ on  
its  
website.  
Where the  
Authority  
is of the  
opinion  
that the  
withdrawal  
of any  
batch of  
condoms  
or gloves is  
necessary  
for the  
protection  
of the  
public, the  
Authority  
may  
require  
any person  
to  
withdraw  
such batch  
in  
accordance  
with the  
procedure

|                             |                  |               |                                                                                                                                                                                             |            |            |                                                                                                                                                                                                                                            |    |     |
|-----------------------------|------------------|---------------|---------------------------------------------------------------------------------------------------------------------------------------------------------------------------------------------|------------|------------|--------------------------------------------------------------------------------------------------------------------------------------------------------------------------------------------------------------------------------------------|----|-----|
|                             |                  |               |                                                                                                                                                                                             |            |            | as<br>determine<br>d by the<br>Authority.<br>See<br>Medicines<br>and Allied<br>Substances<br>Control<br>(Condom)<br>Regulation<br>s, 2005<br>and<br>Medicines<br>and Allied<br>Substances<br>Control<br>(Gloves)<br>Regulation<br>s, 2006. |    |     |
| WHO <sup>53</sup><br>(2016) | None<br>provided | not available | There is no<br>legal<br>framework.<br>The<br>Pharmacy<br>Managemen<br>t,<br>Equipment,<br>Supplies and<br>Medical<br>Supplies<br>division of<br>the MOH is<br>charged<br>with<br>overseeing | No details | No details | No details                                                                                                                                                                                                                                 | No | MoH |

|                          |                                                                                                                                                                                                                                                     |                                                                                                                                                                                                                                   | quality control of medical devices imported and locally manufactured                                                                                                 |            |            |            |    |     |
|--------------------------|-----------------------------------------------------------------------------------------------------------------------------------------------------------------------------------------------------------------------------------------------------|-----------------------------------------------------------------------------------------------------------------------------------------------------------------------------------------------------------------------------------|----------------------------------------------------------------------------------------------------------------------------------------------------------------------|------------|------------|------------|----|-----|
| WHO <sup>54</sup> (2016) | A medical device means any instrument, appliance, material, machine, apparatus, implant or diagnostic reagent used or purported to be suitable for use for medical or veterinary purposes, and includes a part or an accessory of a medical device. | Unclear, there is a Medicines and Related Substances control Act 2003 but this does not include medical devices. Namibia Medicines Regulatory Council has no specific responsibilities assigned in regulation of medical devices. | The Namibia Medicines Regulatory Council purports to register medical devices, but there does not appear to be any legislative mandate or form to apply to register. | No details | No details | No details | No | NRA |

| Medicines Act, Art. 1.      |                              |               |                                                                                                                                                                                |            |            |            |    |     |
|-----------------------------|------------------------------|---------------|--------------------------------------------------------------------------------------------------------------------------------------------------------------------------------|------------|------------|------------|----|-----|
| WHO <sup>55</sup><br>(2016) | same as<br>WHO<br>definition | not available | No details<br>but a<br>decree/law<br>established<br>the NRA<br>which is the<br>Agency of<br>Regulation<br>and<br>Supervision<br>of<br>Pharmaceuti<br>cal Products<br>and Food. | No details | No details | No details | No | NRA |

|                             |                                 |                                                                                 |                                                                                                                                                                                                                                                                                                                                                                                      |                                                                                                                                                                                                                                                                                                                                                                                                                          |                                                                                                                                                                                                                                                                                                                                                                                                                                                        |                                                                                                                                                                                                                                                                                                                                                                                                                                       |                                                                                                                                                                                                                                                                                                                                                                                                                                                                                                                                                         |                                                                                                                                                                                                                                                                                                                                                                                                                                                                                                                                                                |            |                                                        |
|-----------------------------|---------------------------------|---------------------------------------------------------------------------------|--------------------------------------------------------------------------------------------------------------------------------------------------------------------------------------------------------------------------------------------------------------------------------------------------------------------------------------------------------------------------------------|--------------------------------------------------------------------------------------------------------------------------------------------------------------------------------------------------------------------------------------------------------------------------------------------------------------------------------------------------------------------------------------------------------------------------|--------------------------------------------------------------------------------------------------------------------------------------------------------------------------------------------------------------------------------------------------------------------------------------------------------------------------------------------------------------------------------------------------------------------------------------------------------|---------------------------------------------------------------------------------------------------------------------------------------------------------------------------------------------------------------------------------------------------------------------------------------------------------------------------------------------------------------------------------------------------------------------------------------|---------------------------------------------------------------------------------------------------------------------------------------------------------------------------------------------------------------------------------------------------------------------------------------------------------------------------------------------------------------------------------------------------------------------------------------------------------------------------------------------------------------------------------------------------------|----------------------------------------------------------------------------------------------------------------------------------------------------------------------------------------------------------------------------------------------------------------------------------------------------------------------------------------------------------------------------------------------------------------------------------------------------------------------------------------------------------------------------------------------------------------|------------|--------------------------------------------------------|
| WHO <sup>56</sup><br>(2016) | Similar to<br>FDA<br>definition | Class A, B, C,<br>and D.<br>Classification<br>is based on<br>the GHTF<br>rules. | Tanzania<br>Food, Drug,<br>and<br>Cosmetics<br>Act FDCA<br>(2003).<br>There are<br>guidelines<br>on<br>Submission<br>of<br>Documentati<br>on for<br>Registration<br>of Medical<br>Devices<br>(Oct. 2009);<br>Tanzania,<br>Food, Drugs<br>and<br>Cosmetics<br>(Control of<br>Medical<br>Devices)<br>Regulations,<br>2015. The<br>NRA is<br>Tanzania<br>Food and<br>Drug<br>Authority. | A person<br>must have<br>an<br>appropriat<br>e license<br>to<br>manufactu<br>re for sale,<br>sell, offer,<br>supply, or<br>import a<br>medical<br>device.<br>FDCA, Art.<br>22.<br>Exceptions<br>are made<br>for<br>custom-<br>made<br>devices.<br>One must<br>provide a<br>declaratio<br>n of<br>conformity<br>that<br>contains<br>an<br>attestation<br>that a<br>device<br>complies<br>with<br>applicabl<br>internation | Registratio<br>n of<br>establishm<br>ent: A<br>person<br>may not<br>sell, supply<br>or store a<br>medical<br>device<br>except in<br>registered<br>premises.<br>Listing of<br>medical<br>devices: If<br>the TFDA<br>approves<br>registratio<br>n, then it<br>will enter<br>in data on<br>the<br>medical<br>device into<br>the<br>register,<br>assign a<br>registratio<br>n number,<br>and issue a<br>certificate<br>of<br>registratio<br>n. The<br>TFDA | PMS and<br>Inspection<br>of facilities<br>for quality<br>managem<br>ent systems<br>is<br>conducted.<br>To<br>enforce,<br>there are<br>various<br>provisions<br>that<br>impose<br>financial<br>penalties<br>on<br>violations<br>of the<br>FDCA such<br>as fines<br>and<br>imprisonm<br>ent in<br>some<br>cases. The<br>Minister,<br>after<br>consulting<br>with the<br>Director<br>General,<br>may make<br>regulations<br>to prohibit, | False<br>advertising is<br>prohibited. One<br>must obtain<br>written<br>approval for<br>promotional<br>activities.<br>Labelling: No<br>person may sell<br>any registered<br>medical device<br>unless it is<br>labelled with<br>the registered<br>name, number,<br>and directions<br>for use in<br>English and/or<br>Kiswahili. see<br>also Guidelines,<br>p. 24. No person<br>may sell or<br>supply a<br>medical device<br>that is marked<br>or labelled in<br>such a way that<br>it falsely<br>describes the<br>product or is<br>likely to<br>mislead. | Clinical<br>investigation<br>controls: To<br>conduct a<br>clinical trial,<br>one must be<br>(1) the holder<br>of a product<br>registration<br>that<br>authorizes a<br>clinical trial<br>and (2) also<br>the recipient<br>of a "Clinical<br>Trial<br>Certificate."<br>Further, one<br>may only<br>conduct a trial<br>of a medical<br>device with<br>the<br>authorization<br>of the Director<br>General. To<br>apply to<br>conduct a<br>clinical trial, a<br>person must<br>submit an<br>application<br>that includes<br>an Ethical<br>Clearance<br>Certificate. | No details | NRA:<br>Tanzania<br>Food and<br>Drug<br>Authority<br>. |
|-----------------------------|---------------------------------|---------------------------------------------------------------------------------|--------------------------------------------------------------------------------------------------------------------------------------------------------------------------------------------------------------------------------------------------------------------------------------------------------------------------------------------------------------------------------------|--------------------------------------------------------------------------------------------------------------------------------------------------------------------------------------------------------------------------------------------------------------------------------------------------------------------------------------------------------------------------------------------------------------------------|--------------------------------------------------------------------------------------------------------------------------------------------------------------------------------------------------------------------------------------------------------------------------------------------------------------------------------------------------------------------------------------------------------------------------------------------------------|---------------------------------------------------------------------------------------------------------------------------------------------------------------------------------------------------------------------------------------------------------------------------------------------------------------------------------------------------------------------------------------------------------------------------------------|---------------------------------------------------------------------------------------------------------------------------------------------------------------------------------------------------------------------------------------------------------------------------------------------------------------------------------------------------------------------------------------------------------------------------------------------------------------------------------------------------------------------------------------------------------|----------------------------------------------------------------------------------------------------------------------------------------------------------------------------------------------------------------------------------------------------------------------------------------------------------------------------------------------------------------------------------------------------------------------------------------------------------------------------------------------------------------------------------------------------------------|------------|--------------------------------------------------------|



|                                                                                                                    |                                                                                                                                                                                                                                                                                                                                  |                                                                                                                                                                                                                                                                                                                                        |                                                                                                                                                                                                                                                                                                              |
|--------------------------------------------------------------------------------------------------------------------|----------------------------------------------------------------------------------------------------------------------------------------------------------------------------------------------------------------------------------------------------------------------------------------------------------------------------------|----------------------------------------------------------------------------------------------------------------------------------------------------------------------------------------------------------------------------------------------------------------------------------------------------------------------------------------|--------------------------------------------------------------------------------------------------------------------------------------------------------------------------------------------------------------------------------------------------------------------------------------------------------------|
| al standards. Tanzania relies on conformity assessments of other countries, but jurisdiction s were not specified. | registers all medical devices it approves for use in clinical trials. Some low risk medical devices (i.s. class A) need not be registered. Guidelines, p. 12. Exemption from registration does not also discharge legal obligations of medical device dealers to keep records, report adverse events, and recall devices. Import | control, or restrict manufacture, depending on possession, sale or use of a medical device. Further, if the Minister finds that a medical device lack claimed therapeutic value, he or she may prohibit the manufacture, sale, or distribution of the device. An inspector, upon finding a product is unfit or does not meet requireme | Once the TFDA receives the application, it will conduct an investigation to authenticate the safety, efficacy, and quality of the medical device and then register the product for purposes of clinical trials. The TFDA monitors all stages of the clinical trial to ensure protection from adverse events. |
|--------------------------------------------------------------------------------------------------------------------|----------------------------------------------------------------------------------------------------------------------------------------------------------------------------------------------------------------------------------------------------------------------------------------------------------------------------------|----------------------------------------------------------------------------------------------------------------------------------------------------------------------------------------------------------------------------------------------------------------------------------------------------------------------------------------|--------------------------------------------------------------------------------------------------------------------------------------------------------------------------------------------------------------------------------------------------------------------------------------------------------------|

controls: A person must have a license to import a medical devices

nts, may - affix a mark to the device - destroy the product.

An inspector may take any sample for analysis. He or she may also enter the premises entered on the register or on the license and examine any certificate, license, or other information. The inspector may also close premises found to contravene the law.

|                             |                              |                                                                                                        |                                                                                                                                                                                                                                                                                                                   |                                                                                                                                                                                                                                                                                                                                                                                                                                          |                                                                                                                                                                                                                 |                                                                                                                                                                                                                                                                                                                                                                                                                                                  |                                                                                                                                                                                                                                                                                                                                                                                                                                                                                                                                  |    |                                              |
|-----------------------------|------------------------------|--------------------------------------------------------------------------------------------------------|-------------------------------------------------------------------------------------------------------------------------------------------------------------------------------------------------------------------------------------------------------------------------------------------------------------------|------------------------------------------------------------------------------------------------------------------------------------------------------------------------------------------------------------------------------------------------------------------------------------------------------------------------------------------------------------------------------------------------------------------------------------------|-----------------------------------------------------------------------------------------------------------------------------------------------------------------------------------------------------------------|--------------------------------------------------------------------------------------------------------------------------------------------------------------------------------------------------------------------------------------------------------------------------------------------------------------------------------------------------------------------------------------------------------------------------------------------------|----------------------------------------------------------------------------------------------------------------------------------------------------------------------------------------------------------------------------------------------------------------------------------------------------------------------------------------------------------------------------------------------------------------------------------------------------------------------------------------------------------------------------------|----|----------------------------------------------|
| WHO <sup>57</sup><br>(2016) | same as<br>WHO<br>definition | Class A, B, C,<br>and D. There<br>was indication<br>of<br>classification<br>rules in the<br>guidelines | The<br>Pharmacy<br>and Poisons<br>Act, Chapter<br>244 (2002).<br>There are<br>Guidelines<br>on<br>Submission<br>of<br>Documentati<br>on for<br>Registration<br>of Medical<br>Devices<br>(2011). The<br>NRA is<br>Kenya<br>Pharmacy<br>and Poisons<br>Board which<br>supervises<br>medical<br>device<br>regulation | Medical<br>devices<br>must meet<br>essential<br>principles<br>of safety<br>and<br>performan<br>ce. No<br>conformity<br>assessment<br>details<br>given nor<br>requireme<br>nts for<br>registratio<br>n and<br>listing. It<br>was stated<br>when the<br>medical<br>device<br>proves<br>complianc<br>e to<br>applicable<br>essential<br>principles<br>and gets<br>approval<br>of the<br>committee<br>it will be<br>granted a<br>registratio | In terms<br>of imports,<br>One may<br>freely<br>import a<br>medical<br>device<br>after being<br>granted a<br>registratio<br>n<br>certificate<br>and<br>complying<br>with post<br>marketing<br>requireme<br>nts. | Manufactu<br>rers and<br>local<br>authorized<br>representa<br>tives must<br>meet post-<br>market<br>requireme<br>nts that<br>consist of<br>distributio<br>n record-<br>keeping,<br>records of<br>complaints<br>, adverse<br>event<br>reporting.<br>PPB may<br>send an<br>QMS<br>inspection<br>/Auditing<br>group to<br>Class C and<br>D<br>manufactu<br>rers<br>abroad to<br>check their<br>quality<br>assurance<br>system<br>based on<br>Kenyan | Manufacturers<br>and local<br>authorized<br>representatives<br>must maintain<br>records of<br>adverse events<br>and to notify<br>the PPB of any<br>adverse events<br>related to the<br>failure of a<br>device or a<br>deterioration of<br>its<br>effectiveness,<br>etc Users have<br>the primary<br>responsibility to<br>report to PPB<br>and the<br>manufacturer of<br>any adverse<br>event. The<br>manufacturers<br>and local<br>authorized<br>representatives<br>must have field<br>safety<br>corrective<br>actions in place. | No | NRA:<br>Poisons<br>and<br>Pharmac<br>y Board |
|-----------------------------|------------------------------|--------------------------------------------------------------------------------------------------------|-------------------------------------------------------------------------------------------------------------------------------------------------------------------------------------------------------------------------------------------------------------------------------------------------------------------|------------------------------------------------------------------------------------------------------------------------------------------------------------------------------------------------------------------------------------------------------------------------------------------------------------------------------------------------------------------------------------------------------------------------------------------|-----------------------------------------------------------------------------------------------------------------------------------------------------------------------------------------------------------------|--------------------------------------------------------------------------------------------------------------------------------------------------------------------------------------------------------------------------------------------------------------------------------------------------------------------------------------------------------------------------------------------------------------------------------------------------|----------------------------------------------------------------------------------------------------------------------------------------------------------------------------------------------------------------------------------------------------------------------------------------------------------------------------------------------------------------------------------------------------------------------------------------------------------------------------------------------------------------------------------|----|----------------------------------------------|

n  
certificate.

national  
standards  
and other  
relevant  
medical  
device  
standards  
and  
registered  
product  
standards.  
The failure  
to report  
adverse  
events  
may result  
in fines,  
stopping  
the  
affected  
product,  
field safety  
corrective  
action  
(FSCA),  
and/or  
temporary  
withdrawal  
or loss of  
an  
operating  
license.

|                             |                                                                                                                                             |                                                                                                                        |                                                                                                                                                                                                                                                                                                                                                                                         |                                                                                                                                                                                                                                                                   |                                                                                                                                                                                                                                                                                   |                                                                                                                                                                                                                                                                                                           |    |                                                                  |
|-----------------------------|---------------------------------------------------------------------------------------------------------------------------------------------|------------------------------------------------------------------------------------------------------------------------|-----------------------------------------------------------------------------------------------------------------------------------------------------------------------------------------------------------------------------------------------------------------------------------------------------------------------------------------------------------------------------------------|-------------------------------------------------------------------------------------------------------------------------------------------------------------------------------------------------------------------------------------------------------------------|-----------------------------------------------------------------------------------------------------------------------------------------------------------------------------------------------------------------------------------------------------------------------------------|-----------------------------------------------------------------------------------------------------------------------------------------------------------------------------------------------------------------------------------------------------------------------------------------------------------|----|------------------------------------------------------------------|
| WHO <sup>58</sup><br>(2016) | Definition of a medical device is harmonized with the GHTF definition. IVDs are defined separately and harmonized to EU Directive 98/79/EC. | Burkina Faso has a risk-based classification system Class A,B,C,D. Classification rules or other details not available | The Joint Order No.537 2013 on the regulation of in vitro diagnostic medical devices (IVDD) and medical consumables and Joint Order No. 2013- 1125 / MS / MEF on the conditions for the granting, withdrawal and renewal of technical approval for the supply of reagents and medical consumables, and the supply, installation, commissioning and maintenance of material and medical- | There is a conformity assessment procedure for IVDs with reliance on EU/US FDA assessments. Clinical investigations are in place. Registration and Listing is required for some medical devices. Criteria are based on the risk classification of medical devices | Import controls: Each importer must submit an importation application to verify that the IVD is registered. All other medical devices are merely listed when imported. No regulations for advertising but guidelines exist for labeling of medical devices for sale in the market | Adverse event reporting: Burkina Faso has adopted the EU definition of an adverse event. Manufacturers, importers, wholesalers, distributors, and users are responsible to report adverse events. Field safety corrective action monitoring: Manufacturers, importers, wholesalers, distributors and end- | No | NRA: General Directorate of Pharmacy, Medicines and Laboratories |
|-----------------------------|---------------------------------------------------------------------------------------------------------------------------------------------|------------------------------------------------------------------------------------------------------------------------|-----------------------------------------------------------------------------------------------------------------------------------------------------------------------------------------------------------------------------------------------------------------------------------------------------------------------------------------------------------------------------------------|-------------------------------------------------------------------------------------------------------------------------------------------------------------------------------------------------------------------------------------------------------------------|-----------------------------------------------------------------------------------------------------------------------------------------------------------------------------------------------------------------------------------------------------------------------------------|-----------------------------------------------------------------------------------------------------------------------------------------------------------------------------------------------------------------------------------------------------------------------------------------------------------|----|------------------------------------------------------------------|

|                          |                                                                                                                                                                                                        |            |                                           |                                                                                                            |                                                                                                                                                                                                 |                                                                                                               |    |                                                                                      |
|--------------------------|--------------------------------------------------------------------------------------------------------------------------------------------------------------------------------------------------------|------------|-------------------------------------------|------------------------------------------------------------------------------------------------------------|-------------------------------------------------------------------------------------------------------------------------------------------------------------------------------------------------|---------------------------------------------------------------------------------------------------------------|----|--------------------------------------------------------------------------------------|
|                          |                                                                                                                                                                                                        |            | technical equipment.                      |                                                                                                            |                                                                                                                                                                                                 | users are mandatorily responsible for carrying out Field safety corrective action (FSCA) for medical devices. |    |                                                                                      |
| WHO <sup>59</sup> (2016) | Any equipment, device, instrument or product, with the exception of human origin products or other article used alone or in combination, including accessories or software interfering in its function | Non stated | Order of Aouel Dhou El Kaada 1429 (2008). | Medical devices require approval before being placed on the market, and there are import controls in place | Advertising of products must be submitted in advance to the agency. Labelling: Medical and scientific information on medical devices is mandatory. It must be accurate, auditable and compliant | No details                                                                                                    | No | NRA: Department of Pharmacy and Medicines, Ministry of Health, Population and Reform |

g for use in  
humans  
for  
purposes: -  
diagnosis,  
prevention  
,  
monitoring  
,  
treatment  
or  
alleviation  
of disease  
or  
compensat  
ion for an  
injury or  
handicap, -  
study,  
replaceme  
nt or  
modificati  
on the  
anatomy  
or of a  
physiologic  
al process,  
-control of  
medically  
assisted  
procreatio  
n

with the  
most  
recent  
medical  
and  
scientific  
data.

|                                     |               |                                                                                                                                                          |                 |                                                                                                                                                                                                                                                                                                  |                                                                                                                                                                                                                                                                                               |                                                                                                                                           |                                                                                                                                                                                                                                                                                                                                                                                                         |                                                                              |                                                                                                                                                                                                                                                                                                                                                           |                                                                                                                                                                                                                                                                                                                                                                                                                                                                                              |
|-------------------------------------|---------------|----------------------------------------------------------------------------------------------------------------------------------------------------------|-----------------|--------------------------------------------------------------------------------------------------------------------------------------------------------------------------------------------------------------------------------------------------------------------------------------------------|-----------------------------------------------------------------------------------------------------------------------------------------------------------------------------------------------------------------------------------------------------------------------------------------------|-------------------------------------------------------------------------------------------------------------------------------------------|---------------------------------------------------------------------------------------------------------------------------------------------------------------------------------------------------------------------------------------------------------------------------------------------------------------------------------------------------------------------------------------------------------|------------------------------------------------------------------------------|-----------------------------------------------------------------------------------------------------------------------------------------------------------------------------------------------------------------------------------------------------------------------------------------------------------------------------------------------------------|----------------------------------------------------------------------------------------------------------------------------------------------------------------------------------------------------------------------------------------------------------------------------------------------------------------------------------------------------------------------------------------------------------------------------------------------------------------------------------------------|
| Peeling Rosana <sup>60</sup> (2015) | None provided | GHTF classification which considers both personal and public health risk. Class A termed low, Class B moderate, Class C Moderate-High and Class D- High. | Not information | The Pan African Harmonization Working Party (PAHWP) was set up in 2012 under the African Union-New Partnership for Africa's Development (AU-NEPAD) agency. It leads and coordinates regulatory harmonization activities for medicines, medical devices and diagnostics in the African region, in | PAHWP focuses on several priority areas across countries including: a common risk classification system through the adoption of the GHTF dossier for device registration through the WHO-PQ system; QA system audits through WHO-PQ IVDs/diagnostics; QA system audits through convergence on | Post marketing surveillance through regional lab networks to monitor test quality and assurance of quality of diagnostics is recommended. | PAHWP focuses on several priority areas across countries including: a common risk classification system through the adoption of the GHTF system; common dossier template for device registration through the WHO-PQ dossier for IVDs/diagnostics; QA system audits through convergence on inspections to manufacturing sites using preapproved standards/protocols set by IRBs and joint review of data | PAHWP member countries and regional groups, WHO, international organisations | Top 5 challenges for IVD regulations include: regulatory landscape for IVDs highly variable; assessment of safety and quality based on risk classification but often lack rigour; the process of approval is not transparent; Approval is often costly and lengthy, especially for imported tests; limited success with standardisation and harmonization | Strengthening regulatory oversight in Africa through harmonization approaches is key. Supporting the PHWP, AU-NEPAD and regional economic communities is important. Similar initiatives undertaken by 4 SA countries (Zambia, Zimbabwe, Botswana and Namibia) to collaborate and share information on medicines regulation through their NRAs called the Zazibona initiative. Harmonization will result in streamlined regulatory processes, improve access and affordability of MDs, enable |
|-------------------------------------|---------------|----------------------------------------------------------------------------------------------------------------------------------------------------------|-----------------|--------------------------------------------------------------------------------------------------------------------------------------------------------------------------------------------------------------------------------------------------------------------------------------------------|-----------------------------------------------------------------------------------------------------------------------------------------------------------------------------------------------------------------------------------------------------------------------------------------------|-------------------------------------------------------------------------------------------------------------------------------------------|---------------------------------------------------------------------------------------------------------------------------------------------------------------------------------------------------------------------------------------------------------------------------------------------------------------------------------------------------------------------------------------------------------|------------------------------------------------------------------------------|-----------------------------------------------------------------------------------------------------------------------------------------------------------------------------------------------------------------------------------------------------------------------------------------------------------------------------------------------------------|----------------------------------------------------------------------------------------------------------------------------------------------------------------------------------------------------------------------------------------------------------------------------------------------------------------------------------------------------------------------------------------------------------------------------------------------------------------------------------------------|



|                                                                                                                                                                                                                                                                                                        |                                                                                                                                                                                                                                                                                                                                                                                                                  |                                                                                                                                                       |
|--------------------------------------------------------------------------------------------------------------------------------------------------------------------------------------------------------------------------------------------------------------------------------------------------------|------------------------------------------------------------------------------------------------------------------------------------------------------------------------------------------------------------------------------------------------------------------------------------------------------------------------------------------------------------------------------------------------------------------|-------------------------------------------------------------------------------------------------------------------------------------------------------|
| <p>partnership with the WHO and other international groups. 23 countries are members including the East African Community and SADC, along with the African Society for Laboratory Medicine (ASLM), GIZ, LSHTM. The EAC acts as chair with Nigeria and SA as Vice Chair and Secretary respectively.</p> | <p>inspections to manufacturing sites using preapproved standards/protocols set by IRBs and joint review of data from site evaluation, as well as convergence on standards and recognition of third party audits; reduce duplications in clinical performance studies and trials; post marketing surveillance through regional lab networks to monitor test quality and assurance of quality of diagnostics.</p> | <p>faster approvals and access to quality assured devices, save companies time and money, lead to better patient outcomes and support innovation.</p> |
|--------------------------------------------------------------------------------------------------------------------------------------------------------------------------------------------------------------------------------------------------------------------------------------------------------|------------------------------------------------------------------------------------------------------------------------------------------------------------------------------------------------------------------------------------------------------------------------------------------------------------------------------------------------------------------------------------------------------------------|-------------------------------------------------------------------------------------------------------------------------------------------------------|

|                             |                                                                                                                                                                                                                                                         |                                                                                         |                                                                                                                                                                                        |                                                                                                                                                                                                                                                |                                                                                                                                                                                                                                                                                                                                     |                                                                                                                                                                                                                                                                                                                                                      |                |                                       |
|-----------------------------|---------------------------------------------------------------------------------------------------------------------------------------------------------------------------------------------------------------------------------------------------------|-----------------------------------------------------------------------------------------|----------------------------------------------------------------------------------------------------------------------------------------------------------------------------------------|------------------------------------------------------------------------------------------------------------------------------------------------------------------------------------------------------------------------------------------------|-------------------------------------------------------------------------------------------------------------------------------------------------------------------------------------------------------------------------------------------------------------------------------------------------------------------------------------|------------------------------------------------------------------------------------------------------------------------------------------------------------------------------------------------------------------------------------------------------------------------------------------------------------------------------------------------------|----------------|---------------------------------------|
| WHO <sup>61</sup><br>(2016) | A medical device means any instrument, appliance, material, machine, apparatus, implant or diagnostic reagent... or declared by the Minister by notice in the Gazette to be a medical device and includes any part or an accessory of a medical device. | Class A, B, C, and D General Regulations, Art. 12. with classification rules specified. | Medicines and Related Substances Act of 1965, Act No.101. with General Regulations Relating to Medical Devices and In Vitro Diagnostic Medical Devices [hereafter General Regulations] | Use of Notified bodies for conformity assessments must be approved by South Africa. One must apply to the Council to conduct a clinical investigation on an unregistered medical device or on a new intended purpose of medical device or IVD. | Manufacturers must obtain a license, import and/or export a medical device and/or IVD in South Africa. All medical devices, except custom made devices, and all IVDs shall be registered with the Council. Permitted advertisements to certain audience (i.e. public vs. health professionals) vary according to the classification | Inspection (QMS): As part of an application to register a medical device, the manufacturer must certify a QMS is in place. Premises are subject to inspection. Enforcement: Medical devices or IVDs may be seized if they are unregistered and sold in contravention of the Act, suspected counterfeit, expired, etc. General Regulation s, Art. 16. | No information | NRA: Medicine s Control Council (MCC) |
|-----------------------------|---------------------------------------------------------------------------------------------------------------------------------------------------------------------------------------------------------------------------------------------------------|-----------------------------------------------------------------------------------------|----------------------------------------------------------------------------------------------------------------------------------------------------------------------------------------|------------------------------------------------------------------------------------------------------------------------------------------------------------------------------------------------------------------------------------------------|-------------------------------------------------------------------------------------------------------------------------------------------------------------------------------------------------------------------------------------------------------------------------------------------------------------------------------------|------------------------------------------------------------------------------------------------------------------------------------------------------------------------------------------------------------------------------------------------------------------------------------------------------------------------------------------------------|----------------|---------------------------------------|

on of the medical device or IVD. Nonetheless, no advertisement may be false or misleading. The label of a medical device should be in English.

One who fails to comply with the Act may face a fine and/or imprisonment. The applicant or holder of a registration certificate for a medical device or an IVD must inform the Council of suspected adverse events that result from that device.

|                          |      |               |                                                                                            |            |            |            |    |     |
|--------------------------|------|---------------|--------------------------------------------------------------------------------------------|------------|------------|------------|----|-----|
| WHO <sup>62</sup> (2016) | none | not available | Unclear. The NRA is responsible for the registration of drugs and other health products as | No details | No details | No details | No | NRA |
|--------------------------|------|---------------|--------------------------------------------------------------------------------------------|------------|------------|------------|----|-----|

|                          |                                                                                                                                                                                                                               |               |                                                                                                                                                                                                                                                                     |                                                                                                                                                                                                                  |                                                                                                                                                                                                                           |    |     |
|--------------------------|-------------------------------------------------------------------------------------------------------------------------------------------------------------------------------------------------------------------------------|---------------|---------------------------------------------------------------------------------------------------------------------------------------------------------------------------------------------------------------------------------------------------------------------|------------------------------------------------------------------------------------------------------------------------------------------------------------------------------------------------------------------|---------------------------------------------------------------------------------------------------------------------------------------------------------------------------------------------------------------------------|----|-----|
|                          |                                                                                                                                                                                                                               |               | defined in the Health Code in order to grant them a Certificate for Marketing (AMM) in Madagascar                                                                                                                                                                   |                                                                                                                                                                                                                  |                                                                                                                                                                                                                           |    |     |
| WHO <sup>63</sup> (2016) | Medical device means any instrument, apparatus including components, parts and accessories of it, or medical consumables manufactured, sold or represented for use in the diagnosis, treatment, mitigation or prevention of a | not available | The Pharmacy and Drugs Act, No 58 2001 includes some guidelines for medical devices. These are guidelines for conducting clinical trials of medical devices, registration of medical devices, and licensing of manufacturing industries in Sierra Leone. The NRA is | Manufacturers must apply for a license to manufacture a product based on guidelines for Licensing of Manufacturing Industries. Manufacturers are required to have and report on their quality management system. | There is a guide for Detecting and Reporting Adverse Drug Reactions and Field safety corrective action monitoring. Manufacturers shall have arrangements and recording system for handling of complaints, distribution of | No | NRA |

|                          |                                                                                                                                                                                                                                          |                                                                                                                        |                                                                                                           |                                                                             |                                                                                                |                                                                                            |                                                                                                                               |    |     |
|--------------------------|------------------------------------------------------------------------------------------------------------------------------------------------------------------------------------------------------------------------------------------|------------------------------------------------------------------------------------------------------------------------|-----------------------------------------------------------------------------------------------------------|-----------------------------------------------------------------------------|------------------------------------------------------------------------------------------------|--------------------------------------------------------------------------------------------|-------------------------------------------------------------------------------------------------------------------------------|----|-----|
|                          | disease, disorder or abnormal physical state, or the symptoms of it in man or animal. A medical device can be: (a) Condom (b) Glove (Surgical/ Examination) (c) Test - Kit (d) Needle and syringe (e) Insecticide Treated Net (ITN) etc. |                                                                                                                        | Pharmacy Board of Sierra Leone, Ministry of Health and Sanitation.                                        |                                                                             |                                                                                                | products and product recall, when necessary.                                               |                                                                                                                               |    |     |
| WHO <sup>64</sup> (2016) | same as WHO definition                                                                                                                                                                                                                   | Yes<br>Categories: Class I, IIA, IIB, and III. Medical devices are classified by function according to: - the duration | Law n ° 84-12 relating to medical devices. NRA is the National Advisory Commission on Medical Devices. It | Whoever manufactures, exports, or distributes medical devices must submit a | No import controls. Listing of medical devices: One must receive a certificate of registration | Post Market Surveillance: Law n° 84-12 institutes a national system of market surveillance | Medical devices must meet high safety level of use for the patient, professional and meet the requirements of quality, safety | No | NRA |

|                                                                               |                                                                                                                                                                                                                                                                    |                                                                              |                                                                                                                                                                                                                                                                                           |                                                                                                                                                                                                                                                                                                                    |                                    |
|-------------------------------------------------------------------------------|--------------------------------------------------------------------------------------------------------------------------------------------------------------------------------------------------------------------------------------------------------------------|------------------------------------------------------------------------------|-------------------------------------------------------------------------------------------------------------------------------------------------------------------------------------------------------------------------------------------------------------------------------------------|--------------------------------------------------------------------------------------------------------------------------------------------------------------------------------------------------------------------------------------------------------------------------------------------------------------------|------------------------------------|
| of use; invasiveness; the means of use (surgical or not) and use on the body. | gives opinions on Applications for the registration of medical devices; The suspension or revocation of registration; Withdrawal of a medical device from the market for public health reasons; Advertising visa applications and decisions to revoke those visas. | declaration of that activity. Registration of establishment: Not applicable. | n before one may place a medical device on the market. Certain medical devices are exempt from the registration requirement, including device intended for experiments/research and custom-made ones. Advertisements for medical devices may not be deceptive and must show good usage of | e. Inspectors are authorized to conduct periodic inspections of the manufacture, import, export, distribution and maintenance of medical devices. The administration, after consulting with the national commission on medical devices, may order those devices off the market. Fines are available for violations | and performance set by regulation. |
|-------------------------------------------------------------------------------|--------------------------------------------------------------------------------------------------------------------------------------------------------------------------------------------------------------------------------------------------------------------|------------------------------------------------------------------------------|-------------------------------------------------------------------------------------------------------------------------------------------------------------------------------------------------------------------------------------------------------------------------------------------|--------------------------------------------------------------------------------------------------------------------------------------------------------------------------------------------------------------------------------------------------------------------------------------------------------------------|------------------------------------|

|                          |                                                      |                                                                                 |                                                                      |                                                               |                                                                                                                                                          |                                                                                                                                                                                                                                                                      |    |     |
|--------------------------|------------------------------------------------------|---------------------------------------------------------------------------------|----------------------------------------------------------------------|---------------------------------------------------------------|----------------------------------------------------------------------------------------------------------------------------------------------------------|----------------------------------------------------------------------------------------------------------------------------------------------------------------------------------------------------------------------------------------------------------------------|----|-----|
|                          |                                                      |                                                                                 |                                                                      |                                                               | the device. Each medical device must be accompanied by instructions or labels with sufficient information for safe use and to identify the manufacturer. | of certain provisions of the Law. One who manufactures, imports, exports, or distributes medical devices as well as professional users of medical devices must report within 48 hours of learning of any adverse incident or risk of incident when using the device. |    |     |
| WHO <sup>65</sup> (2016) | Referred to as Medical Supplies: products to be used | Categories: according to GHF and FDA principles. Law on Registration of Medical | Law on Registration of Medical supplies 2010. Essential principle is | Outside Sudan, the medical supply should be registered in the | Manufacturers should be registered in the country with listing                                                                                           | Field safety corrective action monitoring: When products                                                                                                                                                                                                             | No | NRA |

|                          |                                                                                                                                                                                                                  |                        |                                                                                                                             |                                                                                                                                                                                                                 |                                                                                                                                                                                                                    |                                                            |    |                                                    |
|--------------------------|------------------------------------------------------------------------------------------------------------------------------------------------------------------------------------------------------------------|------------------------|-----------------------------------------------------------------------------------------------------------------------------|-----------------------------------------------------------------------------------------------------------------------------------------------------------------------------------------------------------------|--------------------------------------------------------------------------------------------------------------------------------------------------------------------------------------------------------------------|------------------------------------------------------------|----|----------------------------------------------------|
|                          | in medical environments.                                                                                                                                                                                         | supplies 2010, Art. 10 | medical supplies should show that they are safe, of good quality and effective. NRA is National Medicines and Poisons Board | producing country.                                                                                                                                                                                              | of medical devices. No data on import controls                                                                                                                                                                     | should be recalled, users and patients should be informed. |    |                                                    |
| WHO <sup>66</sup> (2016) | A medical device "includes an instrument, apparatus, component, part of accessory manufactured or sold for use in the diagnosis, treatment, mitigation or prevention of a disease, disorder or abnormal physical | No information         | The Medicines and Allied Substances Act (2013) establishing the NRA: Zambia Medicine Regulatory Authority.                  | One must obtain marketing authorization from the ZAMRA prior to a medical device's placement on the market, advertisement, manufacture, sell, import, supply, administration, or dealing. Marketing Authorizati | Import controls: A person may not import any allied substance (the definition includes medical devices) without an import permit. Advertising: One may not advertise an allied substance (which includes a medical | No details                                                 | No | NRA: Zambia Medicines Regulatory Authority (ZAMRA) |



state or the symptoms of the disease, in human beings or animals[.]” Medicines and Allied Substances Act, Art. 2. Medical devices are included in the definition of “allied substances .

on procedure described in Art. 39 of the Medicines and Allied Substances Act. Clinical investigati on controls: No person may conduct a clinical trial involving an allied substance (which includes medical devices) without a clinical trial certificate. The Authority shall keep and maintain a Register of Marketing

device) without a marketing authorizati on issued by the ZAMRA. Fraudulent , misleading , and deceptive advertisem ent of allied substances is prohibited. Labelling: Fraudulent , misleading , and deceptive labelling of allied substances is prohibited. Registratio n of establishm ent: A person may not manufactu

|                          |                                                                                                                                 |                |                                                                                                                                                                                                                                                                  |                                                                                                                                                                                                                                                   |                                                                                                                                                                                                                                      |    |                       |
|--------------------------|---------------------------------------------------------------------------------------------------------------------------------|----------------|------------------------------------------------------------------------------------------------------------------------------------------------------------------------------------------------------------------------------------------------------------------|---------------------------------------------------------------------------------------------------------------------------------------------------------------------------------------------------------------------------------------------------|--------------------------------------------------------------------------------------------------------------------------------------------------------------------------------------------------------------------------------------|----|-----------------------|
|                          |                                                                                                                                 |                |                                                                                                                                                                                                                                                                  | Authorisations issued under the Medicines and Allied Substances Act                                                                                                                                                                               | re, distribute, or deal in any allied substance without a license.                                                                                                                                                                   |    |                       |
| WHO <sup>67</sup> (2016) | Medical device: any device used in the medical field for the purpose of diagnosis, testing, cure, surgery or health protection. | None available | Law 47/2012, Art. 2.7 relating to the regulation of food and pharmaceutical products established guidelines for import/export of medicines and other health commodities (includes medical devices). An act of parliament was passed to establish an Inspectorate | Medical devices must meet quality standards and be manufactured in compliance with relevant principles of their manufacture. Any activity related to the manufacture, storing, import or export, sale, packaging, distribution, supply, transport | Import controls: No person shall import and export medical devices unless they are granted a license to do so. Advertising: No person shall label, pack, treat, sell, distribute or advertise any medical device in a manner that is | No | No NRA available yet. |

Authority, Rwanda Inspectorate and Competition Authority (NICA) but it has not yet been implemented.

medical devices must be registered. A licence to operate must be granted. No person shall market a pharmaceutical product or a medical device on the Rwandan market unless such a product or device is registered. Establishments and products are subject to inspection.

false, misleading or is likely to create an erroneous impression regarding its performance, design, use, intended use, value or quality.

|                                   |               |                                                                                                                                                                                                                 |                                                                                                                                                                                                                                                                                                                                                     |                                                                                                                                                                                                                                                                                                    |    |             |                                                                                                                                                                                                                                                                                                                                                                                    |
|-----------------------------------|---------------|-----------------------------------------------------------------------------------------------------------------------------------------------------------------------------------------------------------------|-----------------------------------------------------------------------------------------------------------------------------------------------------------------------------------------------------------------------------------------------------------------------------------------------------------------------------------------------------|----------------------------------------------------------------------------------------------------------------------------------------------------------------------------------------------------------------------------------------------------------------------------------------------------|----|-------------|------------------------------------------------------------------------------------------------------------------------------------------------------------------------------------------------------------------------------------------------------------------------------------------------------------------------------------------------------------------------------------|
| Lissel et al <sup>68</sup> (2016) | None provided | Medical device classification systems follow the 4 tier classification system used in the European system. Kenya and SA used the A-D systems while Ghana, Egypt and Ethiopia followed the I-III or I-IV system. | 7 countries (Egypt, Ethiopia, SA, Kenya, Ghana, Nigeria and Tanzania) had laws and legal directives that empowered the NRA to regulate medical products in general which may include medical devices. They are also responsible for food and medicines control. The majority of the ABEC countries implemented or harmonized European directives in | Based on EU directives, in order to place a medical device on a market, every device must be compliant to the General Requirements to provide a minimum level of safety for patients and others. To demonstrate compliance with these directives, the relevant standards are applied. Most African | No | NRAs, ABEC. | Most African countries and manufacturers are unable to buy the licenses for these standards needed to show compliance with directives for safety of medical devices. Open Source Medical Devices might be an option to simplify regulatory processes in Africa and save costs while having at least the same safety level. However, even for OSMDs the certification is only valid |
|-----------------------------------|---------------|-----------------------------------------------------------------------------------------------------------------------------------------------------------------------------------------------------------------|-----------------------------------------------------------------------------------------------------------------------------------------------------------------------------------------------------------------------------------------------------------------------------------------------------------------------------------------------------|----------------------------------------------------------------------------------------------------------------------------------------------------------------------------------------------------------------------------------------------------------------------------------------------------|----|-------------|------------------------------------------------------------------------------------------------------------------------------------------------------------------------------------------------------------------------------------------------------------------------------------------------------------------------------------------------------------------------------------|

|                                    |               |                   |            |                                                                                 |            |                                                                                                                                                                                                                                                                                                    |                                                                                                                                                                                                                                    |    |                                                                                                                                                                   |                                                                                                                                                                                                                                                                                                                                 |
|------------------------------------|---------------|-------------------|------------|---------------------------------------------------------------------------------|------------|----------------------------------------------------------------------------------------------------------------------------------------------------------------------------------------------------------------------------------------------------------------------------------------------------|------------------------------------------------------------------------------------------------------------------------------------------------------------------------------------------------------------------------------------|----|-------------------------------------------------------------------------------------------------------------------------------------------------------------------|---------------------------------------------------------------------------------------------------------------------------------------------------------------------------------------------------------------------------------------------------------------------------------------------------------------------------------|
|                                    |               | their legislation |            | countries and manufacturers are unable to buy the licenses for these standards. |            |                                                                                                                                                                                                                                                                                                    |                                                                                                                                                                                                                                    |    | for its manufacturer. Every other manufacturer who wants to sell another version of this product on the market must get its own certification.                    |                                                                                                                                                                                                                                                                                                                                 |
| Piaggio et al <sup>69</sup> (2020) | None provided | No information    | No details | No details                                                                      | No details | General poor conditions in hospitals were observed around medical devices including high temperatures, humidity, dust and vermin. Electric panels, power transformers, UPS, cables and electric cabins were not installed, maintained or services as expected. There was a lack of standards and a | Findings from these studies show most donated medical devices are not working or not working properly in low resource settings because of poor regulation. HICs define standards de facto that cannot be met in most of the lower- | No | A clear need to regulate donations "in a more sensible way" and work towards new standards for medical devices to make them more resilient to harsh environments. | Complete change to more user-driven and contextualized MD design, but also there should be a harmonization of the regulations of medical devices and locations between Europe and Africa. Donations should consider viability and should also be supported by a working local management system. This includes installation and |

|                                        |                        |                                                                                                         |                                                                                                                                                       |                                                                                                                                                                                                                         |                                                                                                                                                                                                                                 |                                                                                                                                                                                                                                                                                                                                                                   |                                                                                                                                                                                                                                                                                                          |    |      |                                                                                                                                                                                                                                                                           |                                                                                                                                                                                            |
|----------------------------------------|------------------------|---------------------------------------------------------------------------------------------------------|-------------------------------------------------------------------------------------------------------------------------------------------------------|-------------------------------------------------------------------------------------------------------------------------------------------------------------------------------------------------------------------------|---------------------------------------------------------------------------------------------------------------------------------------------------------------------------------------------------------------------------------|-------------------------------------------------------------------------------------------------------------------------------------------------------------------------------------------------------------------------------------------------------------------------------------------------------------------------------------------------------------------|----------------------------------------------------------------------------------------------------------------------------------------------------------------------------------------------------------------------------------------------------------------------------------------------------------|----|------|---------------------------------------------------------------------------------------------------------------------------------------------------------------------------------------------------------------------------------------------------------------------------|--------------------------------------------------------------------------------------------------------------------------------------------------------------------------------------------|
|                                        |                        |                                                                                                         |                                                                                                                                                       |                                                                                                                                                                                                                         |                                                                                                                                                                                                                                 | failure to meet minimum requirements for use and maintenance of medical devices (structural, organizational and technical)                                                                                                                                                                                                                                        | resource settings.                                                                                                                                                                                                                                                                                       |    |      |                                                                                                                                                                                                                                                                           | maintenance support.                                                                                                                                                                       |
| Saidi and Douglas <sup>70</sup> (2016) | Same as WHO definition | Most countries used a 4-tier risk based classification system in line with WHO or GHTF recommendations. | All countries studies had some national policy, Act or legislation regarding regulatory oversight of medical products which includes medical devices. | None of the ten African countries discussed have specific regulations or regulatory bodies dedicated to medical devices. All countries performed pre-market regulatory oversight through NRAs charged with oversight of | Various regulatory processes highlighted: pre-import verification of conformity of standards (Kenya); foreign manufacturers providing license evidence and have duly registered agents in-country (Nigeria); specialised expert | The regulations have a strong focus on imports. This is not surprising given heavy reliance on medical devices from developed countries. Few local companies manufacture products for the domestic and export markets. The regulatory approval process is lengthy, not transparent and not as efficient for oversight of these imports as seen in the substandard | Medical device regulations in Africa are designed along the framework of models used in developed countries. For example, the requirements for importation and exportation of medical devices in South Africa, Algeria, Kenya and Ethiopia are similar to the internationally recognised certification/r | No | NRAs | Limited resources and a critical mass of skilled personnel to focus solely on the regulation of medical devices. Under such conditions, the regulatory bodies may fail to cope with registrations of medical devices, which would result in delays and ultimately lack of | Harmonization. Limited regulation a factor hindering access to medical devices in African settings, varying requirements across countries is disincentive for manufacturers and developers |

|                                                                                                                                                                                                                                                          |                                                                                                                                                                                                                                                                                                  |                         |                                                                                                                                                                                                                                          |                                          |
|----------------------------------------------------------------------------------------------------------------------------------------------------------------------------------------------------------------------------------------------------------|--------------------------------------------------------------------------------------------------------------------------------------------------------------------------------------------------------------------------------------------------------------------------------------------------|-------------------------|------------------------------------------------------------------------------------------------------------------------------------------------------------------------------------------------------------------------------------------|------------------------------------------|
| pharmaceuticals and related medical products, food, and/or cosmetics. Other regulatory organisations included MoH and its Depts and Special Committees in countries. Tanzania and Ethiopia conduct inspection of manufacturing facilities to ensure GMP. | committee reviewing technical document for import approval (Egypt); temporary licenses for donated equipment (Sudan); requirements for local representative or vendor authorised to distribute and sell MDs (Algeria, Ethiopia) and issuance of device licenses to manufacturers etc (S/Africa). | MDs seen in the region. | registration programmes of the European CE Mark, the US FDA and the Australian Hybrid Therapeutic Goods Administration. This is important in that it aligns African countries with a harmonised framework for medical device regulation. | access to medical devices by the public. |
|----------------------------------------------------------------------------------------------------------------------------------------------------------------------------------------------------------------------------------------------------------|--------------------------------------------------------------------------------------------------------------------------------------------------------------------------------------------------------------------------------------------------------------------------------------------------|-------------------------|------------------------------------------------------------------------------------------------------------------------------------------------------------------------------------------------------------------------------------------|------------------------------------------|

|                                    |                     |                                                                                         |                                                                                                                                                                                                                                                                                                                                                                        |                                                                                                                                                                                                                                                                                                                    |                                                                                                                                                                                                                                                                       |                                                                                                                                                                                                                                                                                     |                                                                                                                                                                                                                                                                                                                                    |                                                                                                                                                                                                                                                                                                                                                                                             |    |      |                                                                                                                                                                                                                                                                                                                                                                               |                                                                                                                                                                                        |
|------------------------------------|---------------------|-----------------------------------------------------------------------------------------|------------------------------------------------------------------------------------------------------------------------------------------------------------------------------------------------------------------------------------------------------------------------------------------------------------------------------------------------------------------------|--------------------------------------------------------------------------------------------------------------------------------------------------------------------------------------------------------------------------------------------------------------------------------------------------------------------|-----------------------------------------------------------------------------------------------------------------------------------------------------------------------------------------------------------------------------------------------------------------------|-------------------------------------------------------------------------------------------------------------------------------------------------------------------------------------------------------------------------------------------------------------------------------------|------------------------------------------------------------------------------------------------------------------------------------------------------------------------------------------------------------------------------------------------------------------------------------------------------------------------------------|---------------------------------------------------------------------------------------------------------------------------------------------------------------------------------------------------------------------------------------------------------------------------------------------------------------------------------------------------------------------------------------------|----|------|-------------------------------------------------------------------------------------------------------------------------------------------------------------------------------------------------------------------------------------------------------------------------------------------------------------------------------------------------------------------------------|----------------------------------------------------------------------------------------------------------------------------------------------------------------------------------------|
| Dusabe Gloria <sup>71</sup> (2020) | WHO definition used | Risk based approach to classification was noted in countries with regulatory guidelines | No details. Overall, regulation of medical devices in Africa is limited and the participating African countries were at different maturity levels with respect to existence of medical device regulation, guidelines and actual practice. The WHO Global Model Regulatory Framework for MDs including IVDs medical devices is intended to act as a guide to WHO member | Kenya, Tanzania and Ghana had regulations to guide registration of MDs/IVDs mainly by assessment of technical documents submitted. Uganda and Rwanda had no regulations but relied on international guidelines such as ISO 3485 and USP. All countries recognised the need for revisions of guidelines to increase | Most countries accept approvals based on international guidelines (ISO, US FDA, CE, Health Canada, PMDA Japan) without needing additional regulations in-country. Uganda carries out testing of gloves, condoms and syringes through its Directorate of Lab services. | All countries reported some form of post market vigilance activities of approved or cleared devices but this is not often comprehensive. Focus has remained on pre-market approvals, with less emphasis on tracking safety, effectiveness and performance while devices are in use. | Regulatory officers reported receiving basic training in evaluation of MDS- ISO certification, desk review of dossiers, risk based classification, conformity testing etc. Additional training was scheduled based on emerging needs. Training partnerships were formed between South countries as well as Global North and South. | Medical devices are unique and diverse and may require a different regulatory framework than the current medical product approach for oversight in use which is largely focused on pre-market approval. Current regulations may not be clear and subject to gaps in interpretation, or unable to cope with the fast changing pace of technology and development of MDs. Importers have been | No | NRAs | Challenges reported by the participants included inadequate funding and insufficient staffing. In countries without guidelines, delays in establishment of regulatory bodies was experienced with conflict between government sectors on the scope and mandate of control of MDs. More emphasis being placed on pre-market activities and neglect of post market surveillance | Harmonisation efforts: 2 regional blocs were identified working towards harmonisation of regulatory guidelines. These are the EAC and the PAHWP now the African Medical Devices Forum. |
|------------------------------------|---------------------|-----------------------------------------------------------------------------------------|------------------------------------------------------------------------------------------------------------------------------------------------------------------------------------------------------------------------------------------------------------------------------------------------------------------------------------------------------------------------|--------------------------------------------------------------------------------------------------------------------------------------------------------------------------------------------------------------------------------------------------------------------------------------------------------------------|-----------------------------------------------------------------------------------------------------------------------------------------------------------------------------------------------------------------------------------------------------------------------|-------------------------------------------------------------------------------------------------------------------------------------------------------------------------------------------------------------------------------------------------------------------------------------|------------------------------------------------------------------------------------------------------------------------------------------------------------------------------------------------------------------------------------------------------------------------------------------------------------------------------------|---------------------------------------------------------------------------------------------------------------------------------------------------------------------------------------------------------------------------------------------------------------------------------------------------------------------------------------------------------------------------------------------|----|------|-------------------------------------------------------------------------------------------------------------------------------------------------------------------------------------------------------------------------------------------------------------------------------------------------------------------------------------------------------------------------------|----------------------------------------------------------------------------------------------------------------------------------------------------------------------------------------|



|                                                                    |                        |                                                                                                                                             |                                                                                                                                                                                       |            |            |                                                                                                                                                      |                                      |                  |                                                                                                                                                                      |
|--------------------------------------------------------------------|------------------------|---------------------------------------------------------------------------------------------------------------------------------------------|---------------------------------------------------------------------------------------------------------------------------------------------------------------------------------------|------------|------------|------------------------------------------------------------------------------------------------------------------------------------------------------|--------------------------------------|------------------|----------------------------------------------------------------------------------------------------------------------------------------------------------------------|
|                                                                    |                        | states that plan on setting up regulatory frameworks for MDs.                                                                               | premarket assessments and post market vigilance. Only 2 countries (Ghana and Tanzania) reported conducting some inspection of manufacturing facilities based on ISO/country guidance. |            |            |                                                                                                                                                      | show to adhere poorly to guidelines. |                  | due to lack of funds to conduct related activities.                                                                                                                  |
| African Union Development Agency [AUDA-NEPAD] <sup>72</sup> (2019) | Same as WHO definition | Increased awareness of medical device regulation and established legal framework and introduction of regulatory framework by more countries | No details                                                                                                                                                                            | No details | No details | PAHWP's scope of work includes capacity building on; registration and common dossier submissions; quality audit and inspection; clinical performance | No                                   | AUDA, PAWHP, WHO | Improved collaboration, convergence, work sharing and networking amongst members. For example harmonized registration requirements, acceptance of quality management |

was noted in Africa, including adoption of GHTF definition, risk classification, basis for reliance and recognition, requirements for manufacturing, declaration of conformity etc.

studies; and post-market surveillance. The PAHWP will also be responsible for conducting training programmes and providing resources to NRAs as part of capacity building.

system auditing reports, shared point for adverse events reports etc. Collaboration with other harmonization initiatives such as AHWP, IMDRF, ASEAN, APEC and any other interested partner should be enhanced.

\*Citation of the included source of evidence as it appears in manuscript in superscript.
